# Supplementary material for: Loss of ARL13 impedes BBSome-dependent cargo export from Chlamydomonas cilia
Source: PubMed Central journal article supplement — J Cell Biol. 2022 Aug 30;221(10):e202201050. doi: 10.1083/jcb.202201050 (PMC9436004; doi:10.1083/jcb.202201050), 2022-08-30

# Figure 1B

**Loaded:**

WT, arl13, arl13 ARL13-NG 6A, 8D, 12B

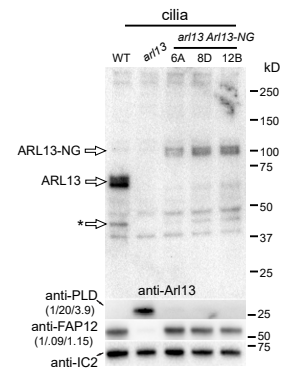

anti-ARL13

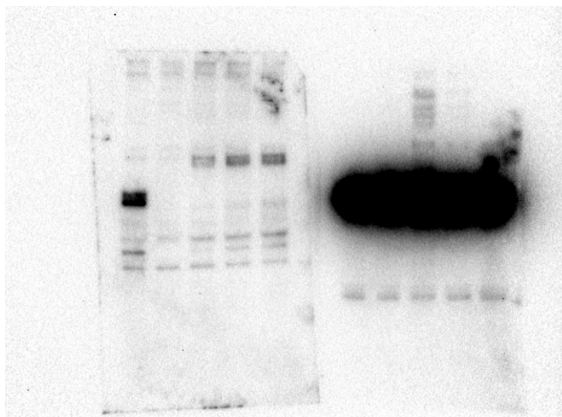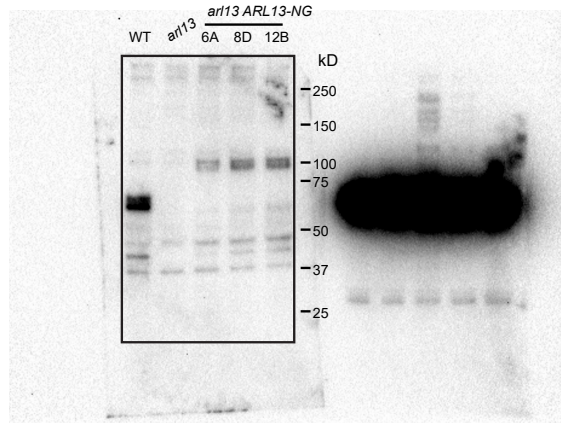

anti-PLD

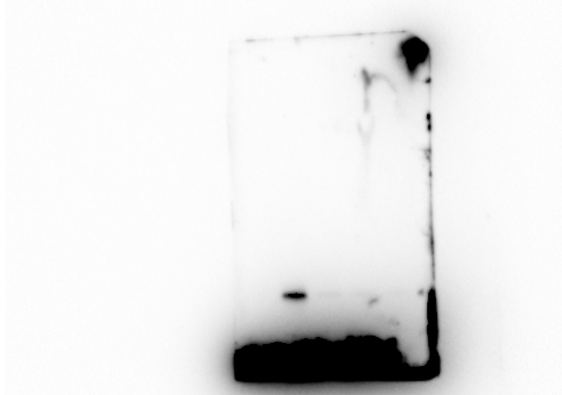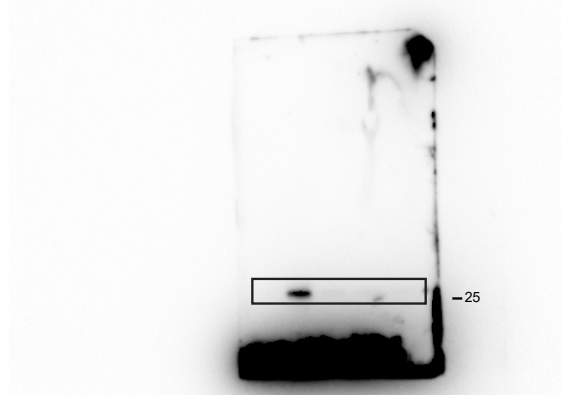

anti-FAP12

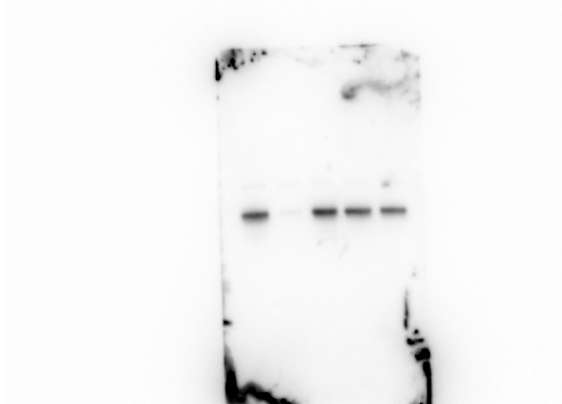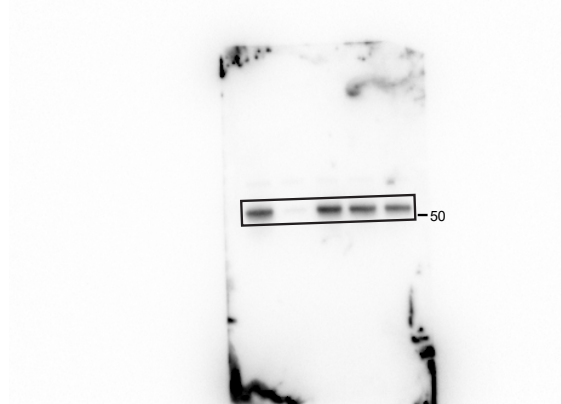

anti-IC2

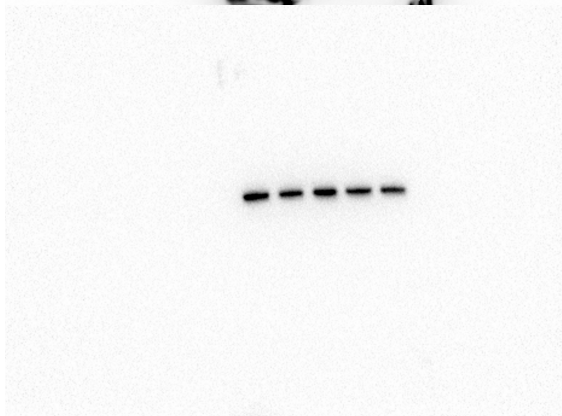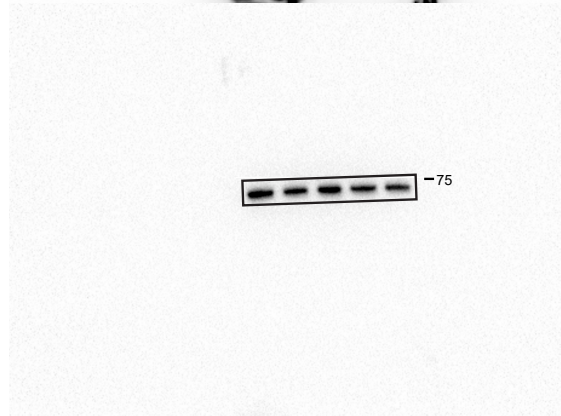

Figure 1F

**Loaded:**

strain x, strain y, WT, *arl13*, *bbs4-1*, strain z

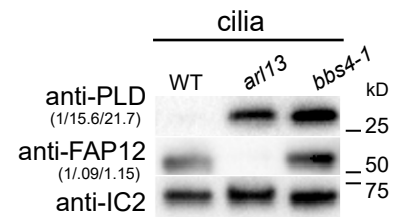

anti-PLD

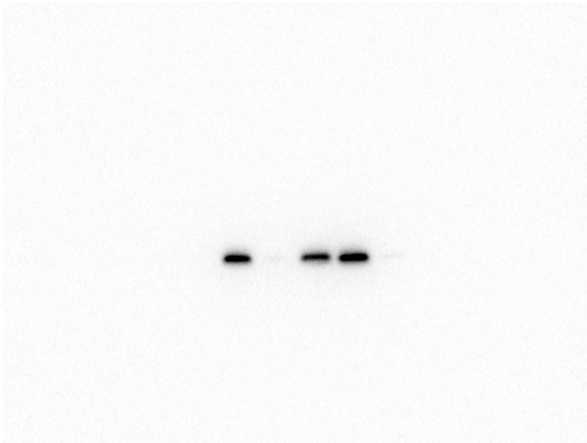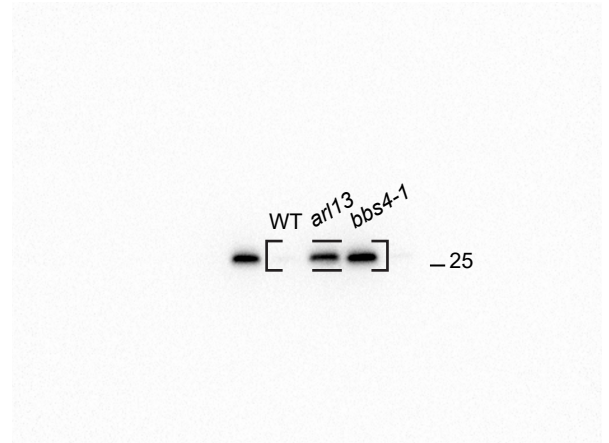

anti-FAP12

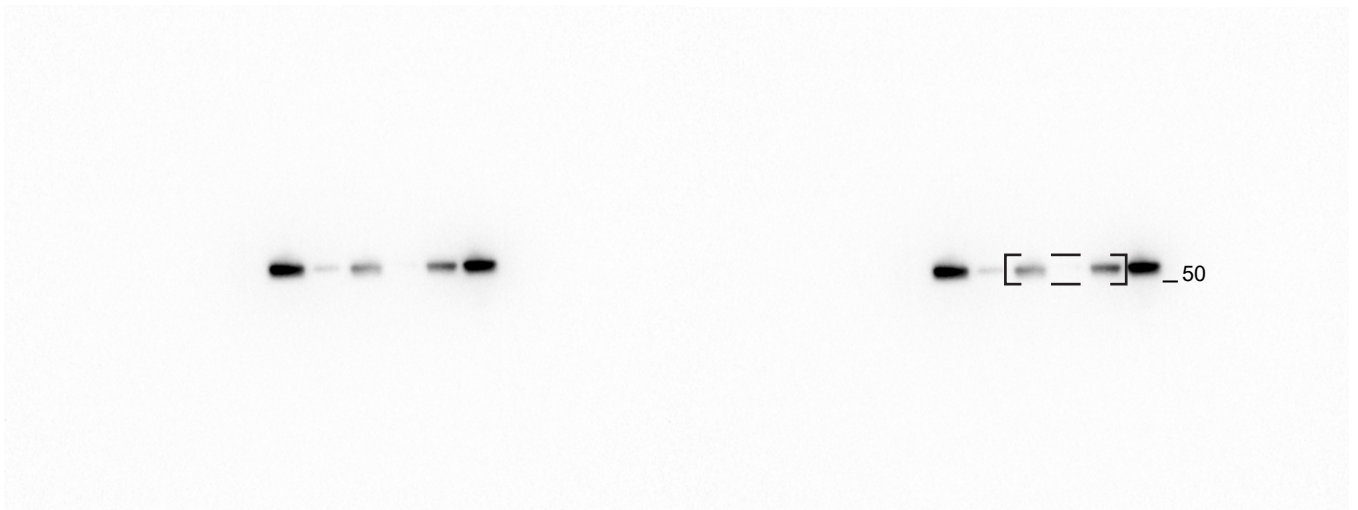

anti-FAP12

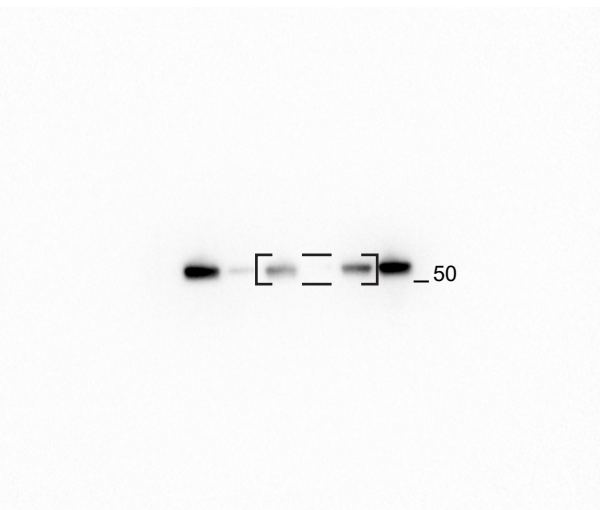

anti-IC2

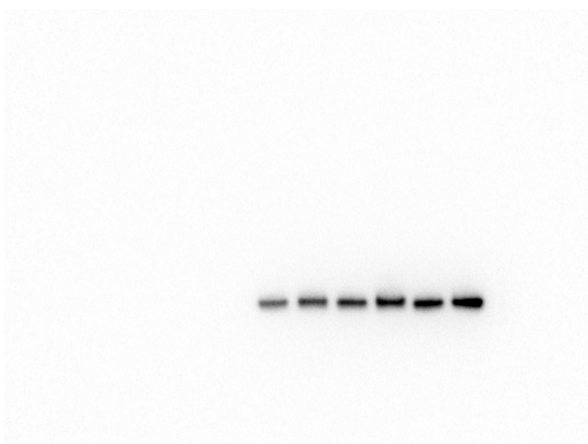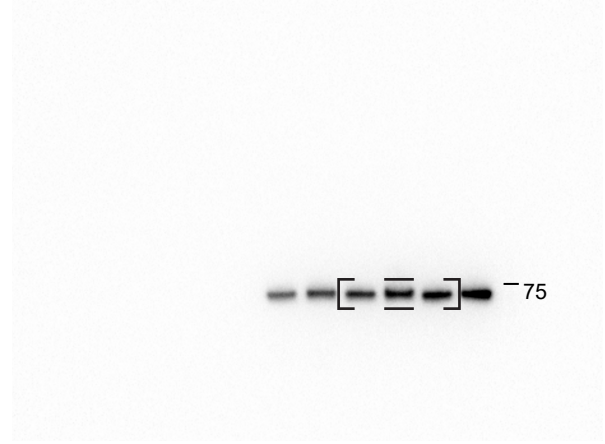

Supplement: JCB_202201050_SourceDataF1.pdf [file JCB_202201050_SourceDataF1.pdf]
