# Supplementary material for: Loss of ARL13 impedes BBSome-dependent cargo export from Chlamydomonas cilia
Source: PubMed Central journal article supplement — J Cell Biol. 2022 Aug 30;221(10):e202201050. doi: 10.1083/jcb.202201050 (PMC9436004; doi:10.1083/jcb.202201050), 2022-08-30

Figure 3A

Loaded:  
WT, *arl13*

|                    | cilia |              |     |
|--------------------|-------|--------------|-----|
|                    | WT    | <i>arl13</i> | kD  |
| anti-BBS1 (1/1.79) |       |              | -50 |
| anti-BBS3 1/1.44   |       |              | -20 |
| anti-BBS4 (1/1.07) |       |              | -37 |
| anti-BBS5 (1/1.78) |       |              | -37 |
| anti-IC2 (1/1)     |       |              | -75 |

anti-BBS1

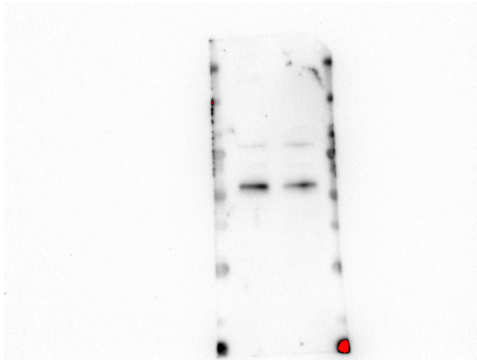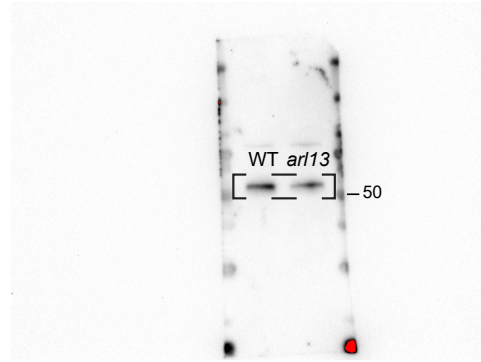

anti-BBS3

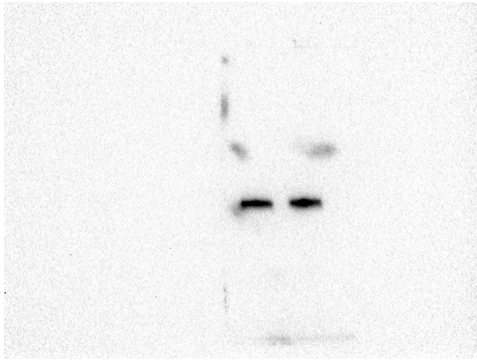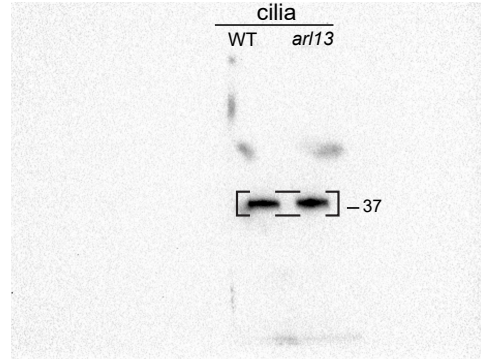

anti-BBS4

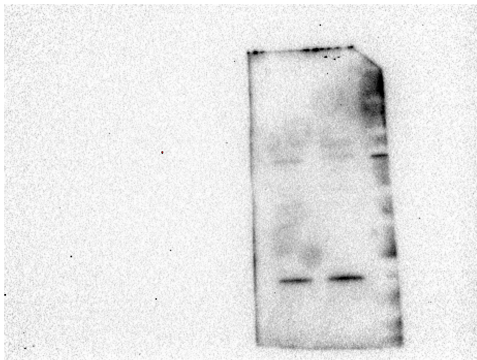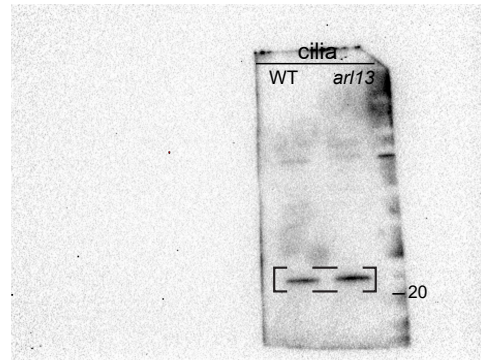

anti-BBS5

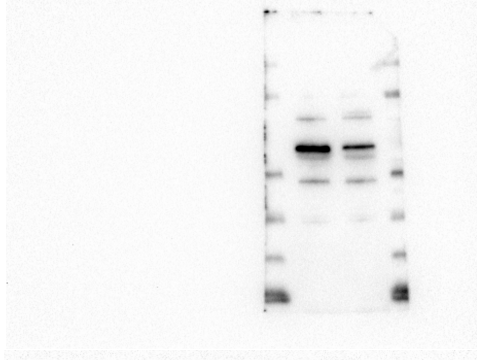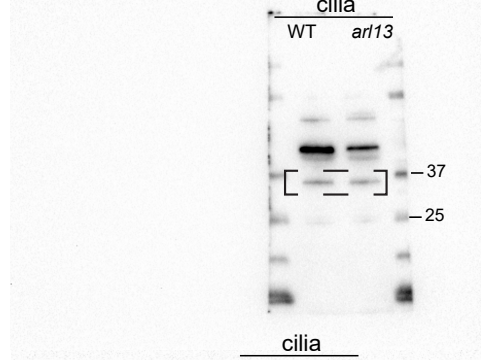

anti-IC2

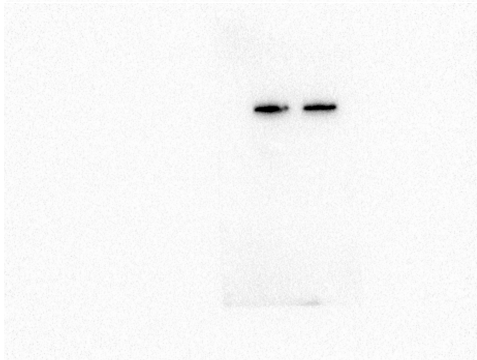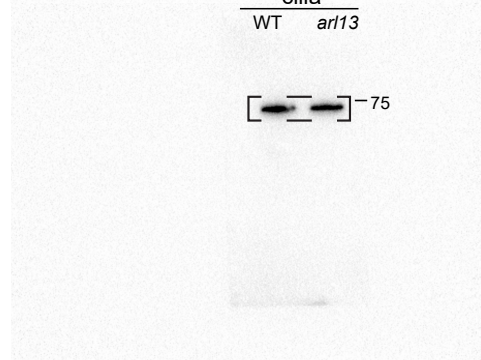

Figure 3B

**Loaded:**

WT, *bbs4-1*, *arl13*, *bbs4-1 BBS4-GFP*,  
and *arl13 bbs4-1 BBS4-GFP*

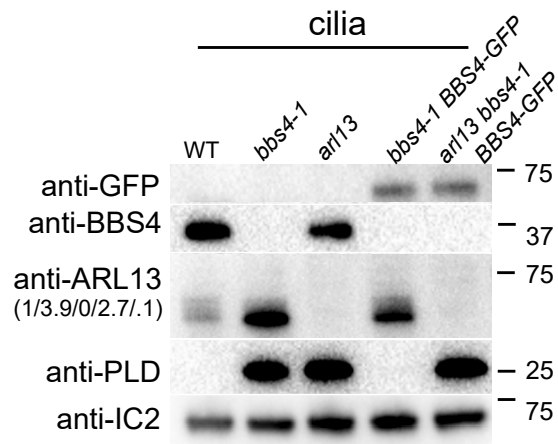

anti-GFP

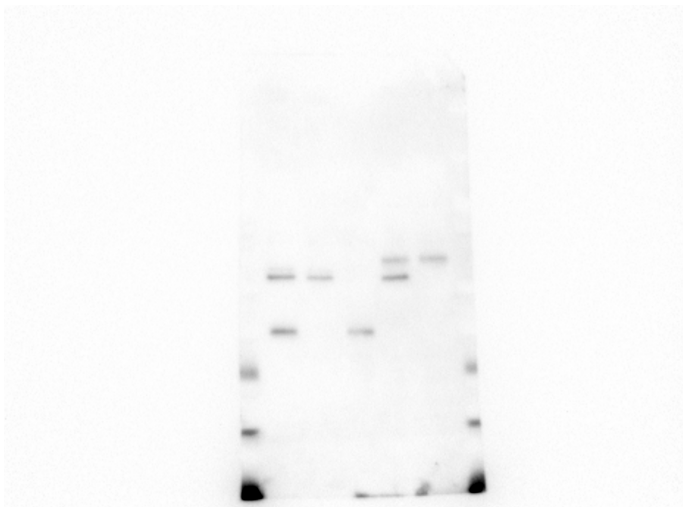

WT *bbs4-1* *arl13* *bbs4-1 BBS4-GFP* *arl13 bbs4-1 BBS4-GFP*  
[ - - - ] - 75

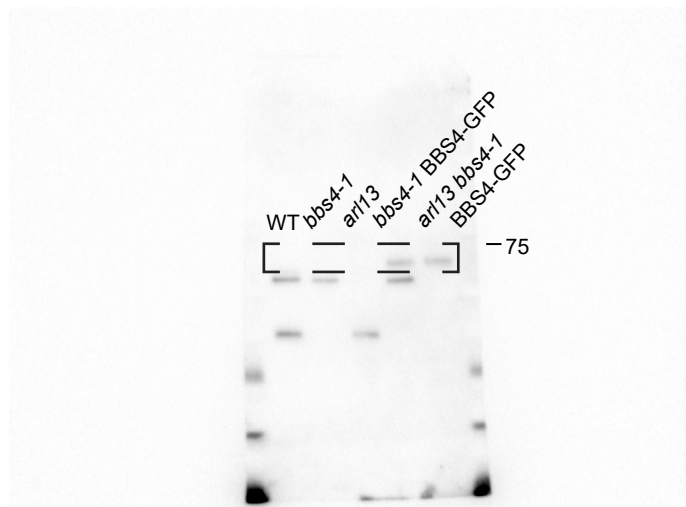

anti-BBS4

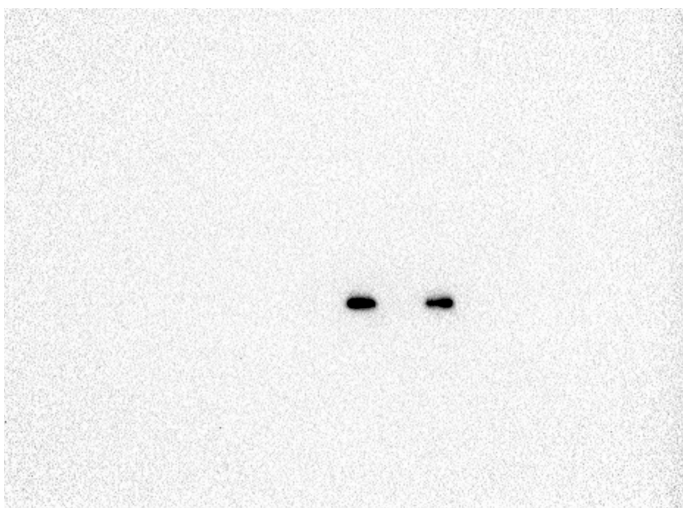

[ - - - ] - 37

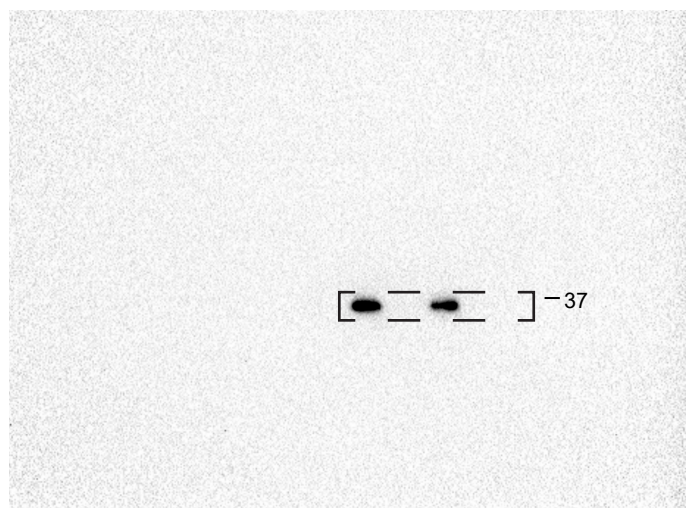

anti-ARL13

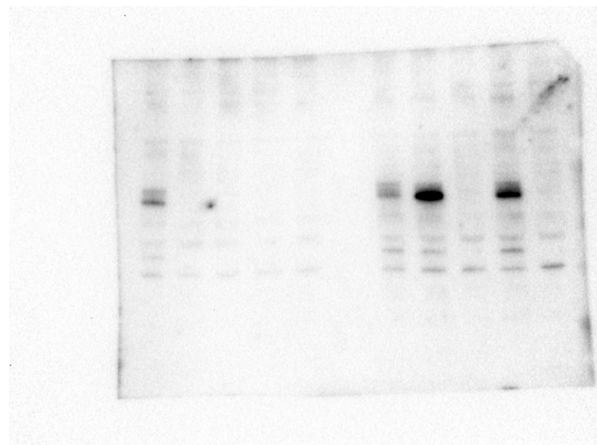

[ - - - ] - 75

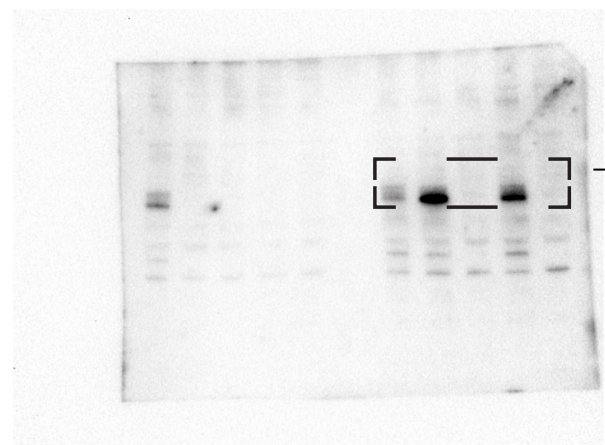

Figure 3B\_continued

**Loaded:**

WT, *bbs4-1*, *arl13*, *bbs4-1 BBS4-GFP*,  
and *arl13 bbs4-1 BBS4-GFP*

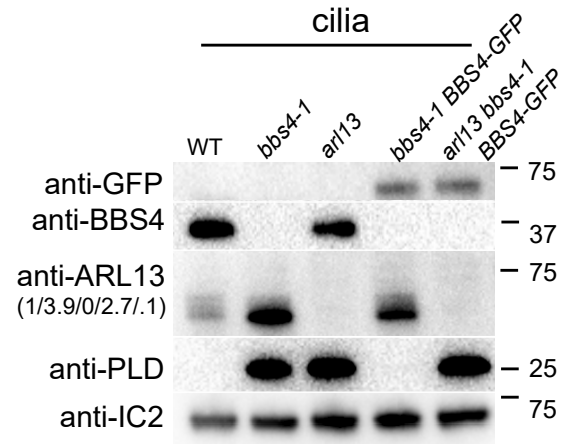

anti-PLD

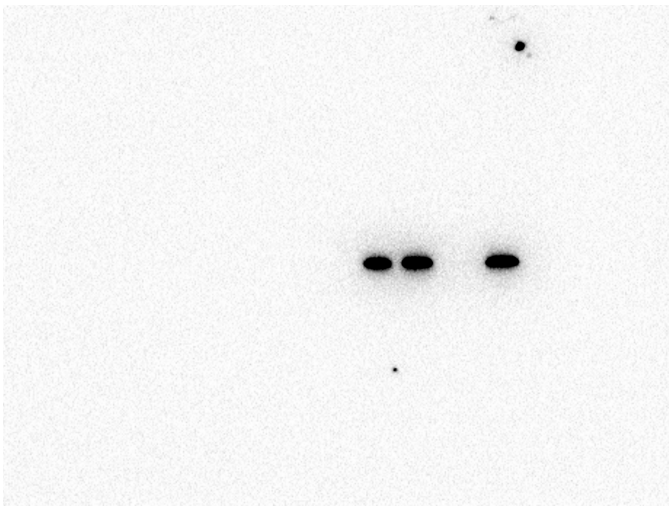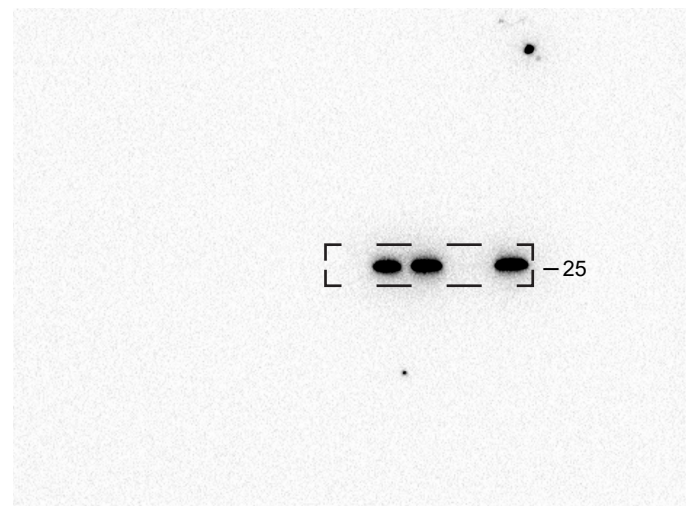

anti-IC2

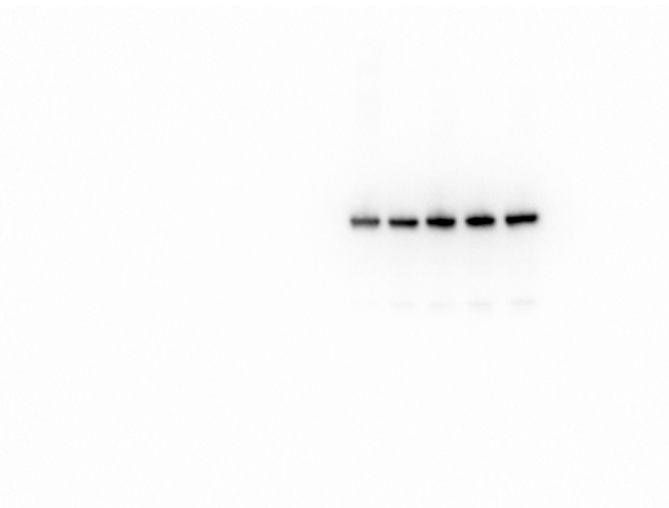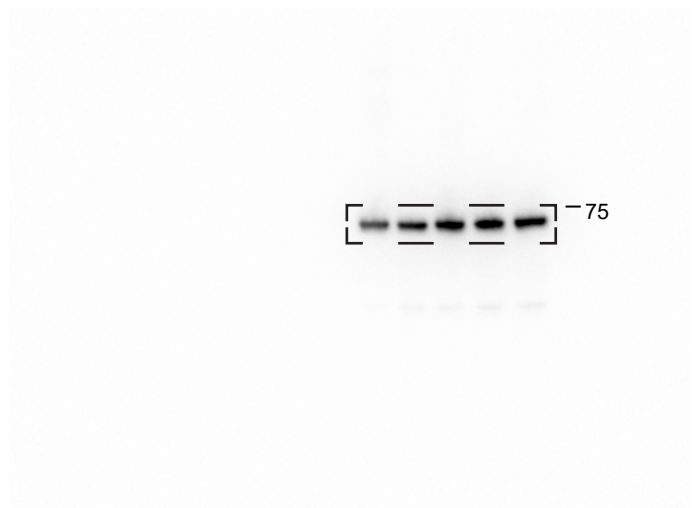

Supplement: JCB_202201050_SourceDataF3.pdf [file JCB_202201050_SourceDataF3.pdf]
