# Supplementary material for: Loss of ARL13 impedes BBSome-dependent cargo export from Chlamydomonas cilia
Source: PubMed Central journal article supplement — J Cell Biol. 2022 Aug 30;221(10):e202201050. doi: 10.1083/jcb.202201050 (PMC9436004; doi:10.1083/jcb.202201050), 2022-08-30

Fig. 4 B – Source file

(two replica membranes)

From top; anti-IC2, anti-PLD (membrane 2)

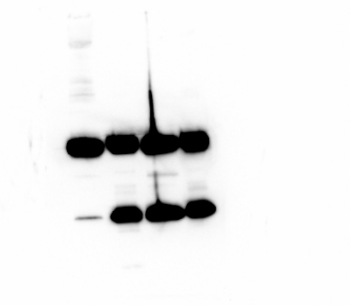

Anti-ARL13 (membrane 1)

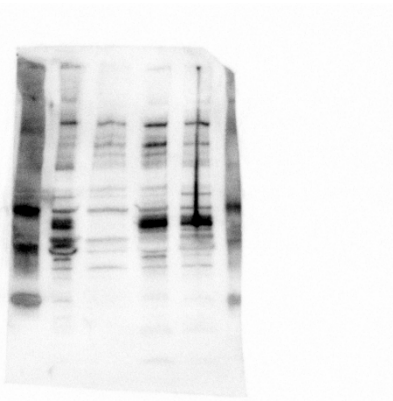

B

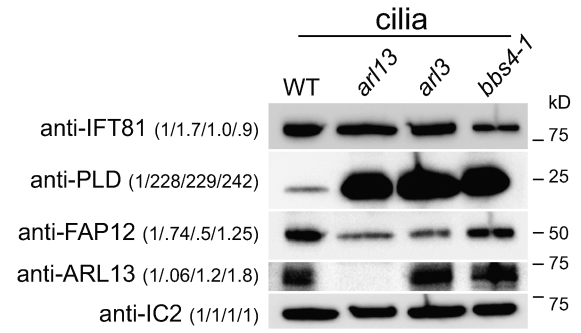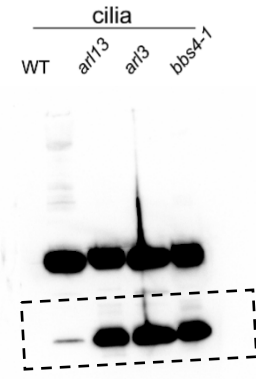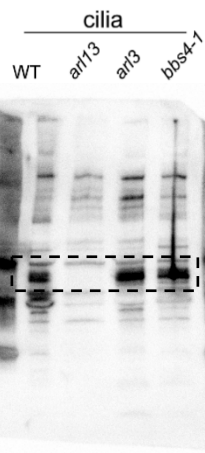

anti-FAP12 (and anti-IC2 [top]) (membrane 1)

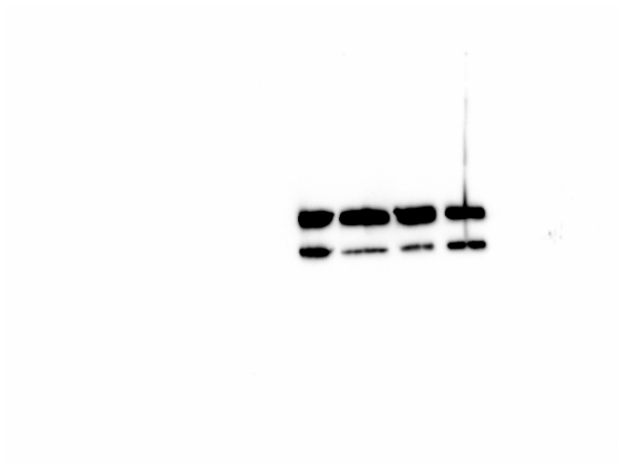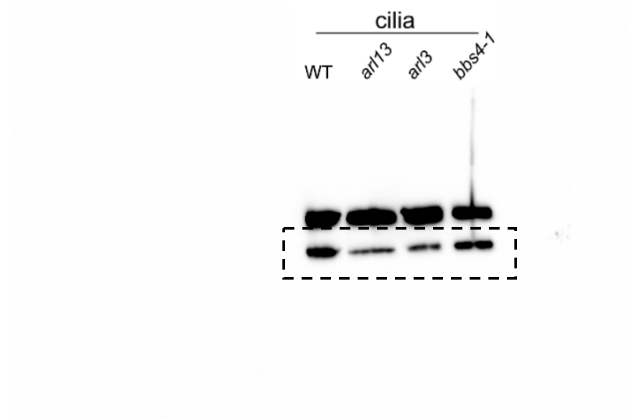

anti-IC2 (membrane 2)

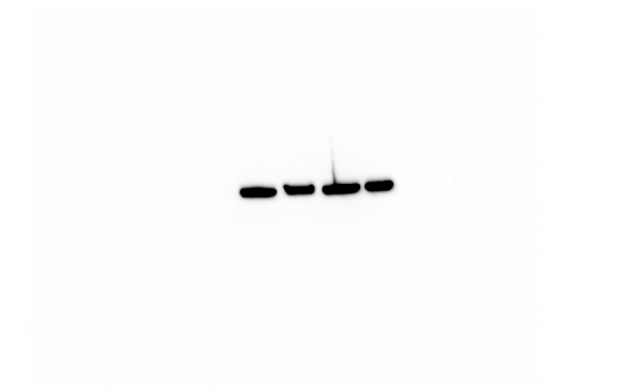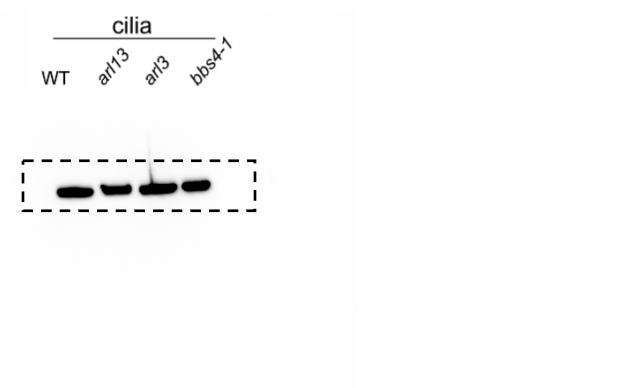

Anti-IFT81 (membrane 1)

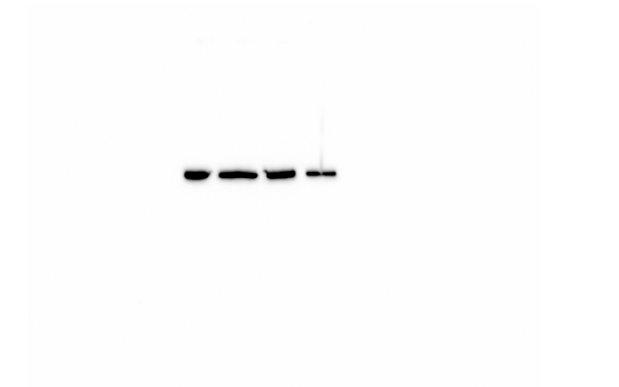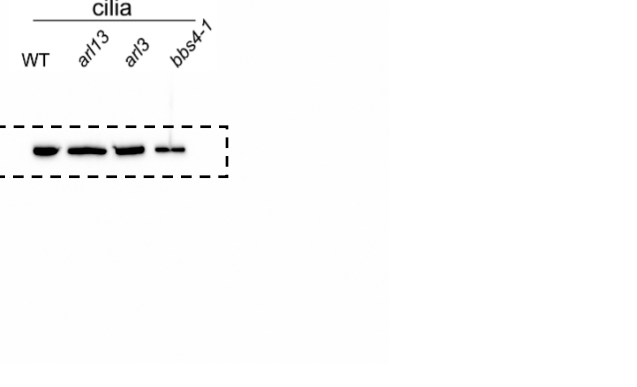

Fig. 4C – source file

(two replica membranes)

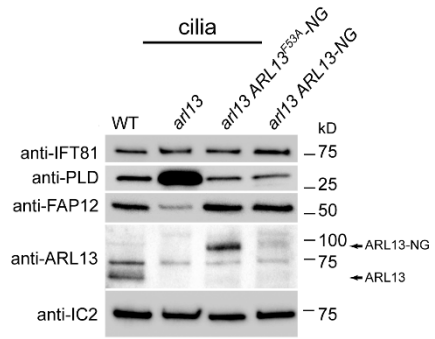

Anti-Fap12 (membrane 1, 1<sup>st</sup> AB)

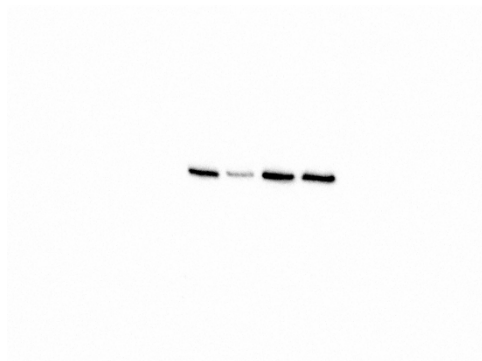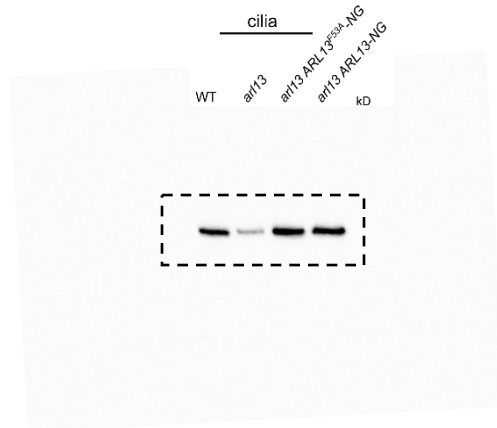

anti-IFT81 (membrane 1, 2<sup>nd</sup> AB)

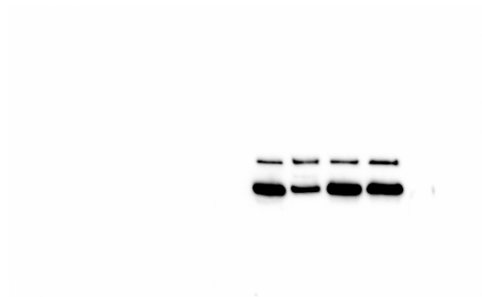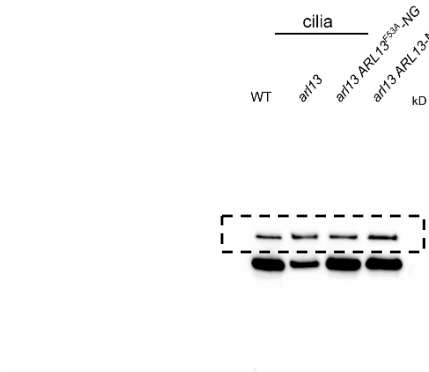

Anti-PLD (membrane 2, 1<sup>st</sup> AB)

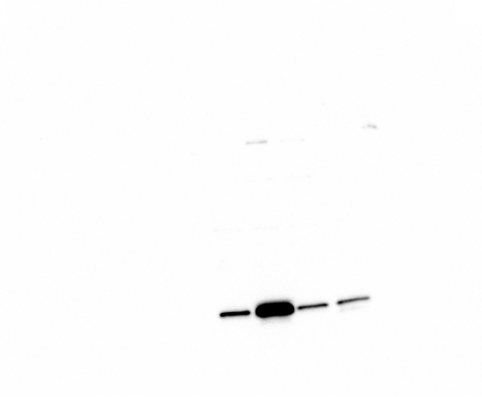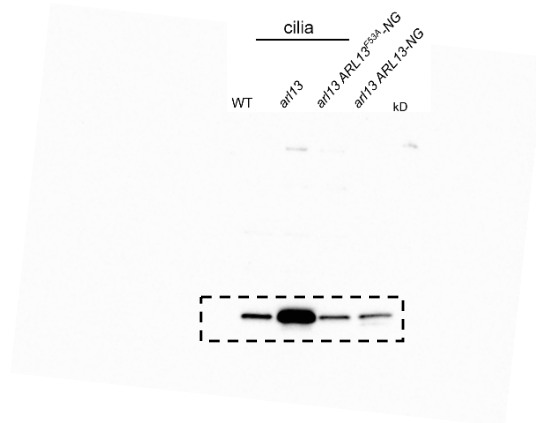

Anti-ARL13

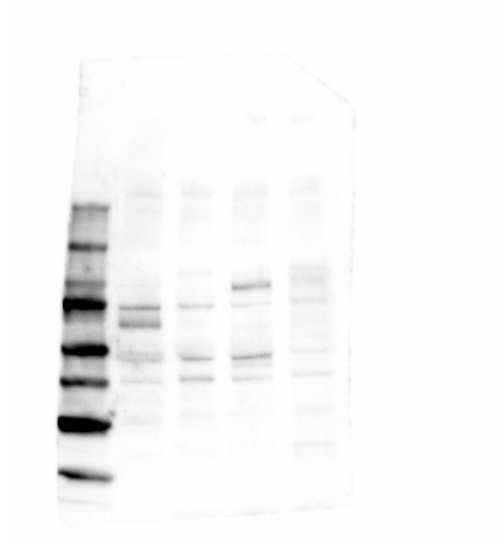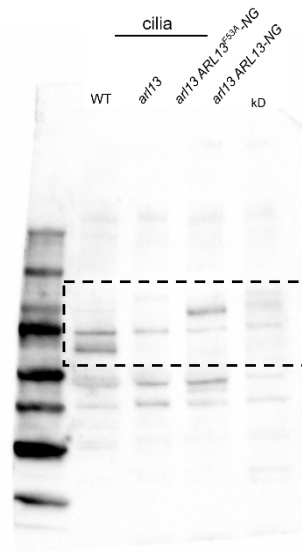

Anti-IC2 (membrane 2, 2<sup>nd</sup> AB)

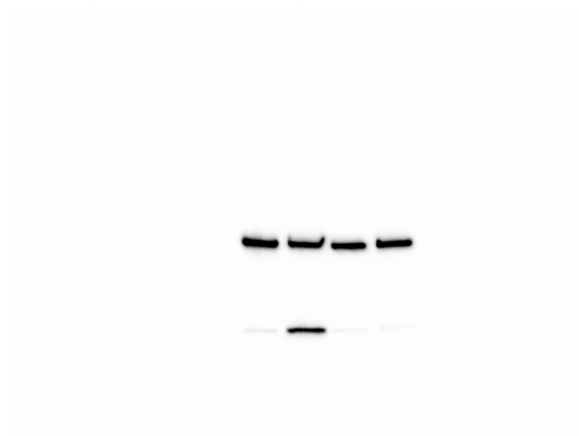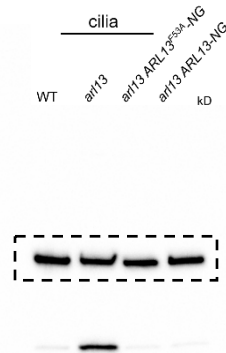

Supplement: JCB_202201050_SourceDataF4.pdf [file JCB_202201050_SourceDataF4.pdf]
