# Supplementary material for: Loss of ARL13 impedes BBSome-dependent cargo export from Chlamydomonas cilia
Source: PubMed Central journal article supplement — J Cell Biol. 2022 Aug 30;221(10):e202201050. doi: 10.1083/jcb.202201050 (PMC9436004; doi:10.1083/jcb.202201050), 2022-08-30

# Figure 5A

A

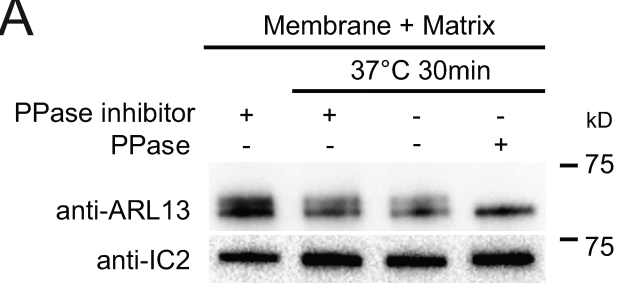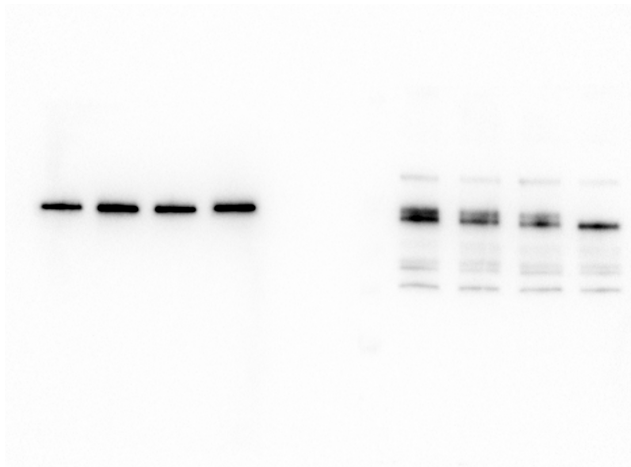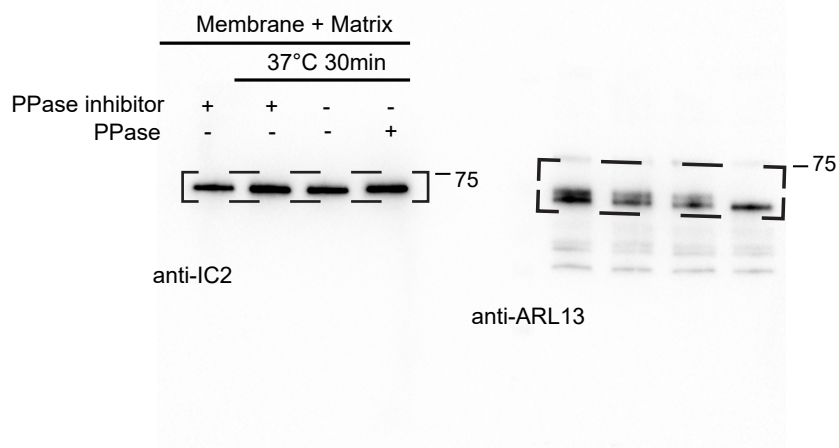

Fig. 5B – Source file

1st AB: anti-ARL13

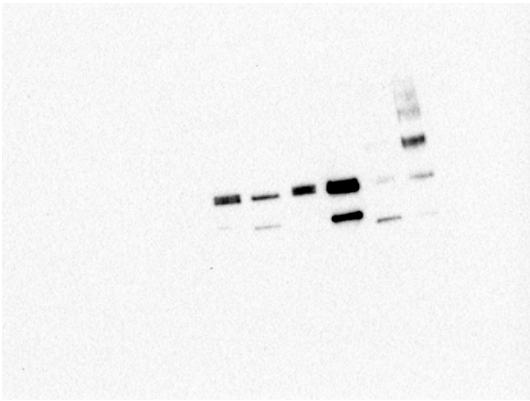

Anti-IC2 and anti-IFT172

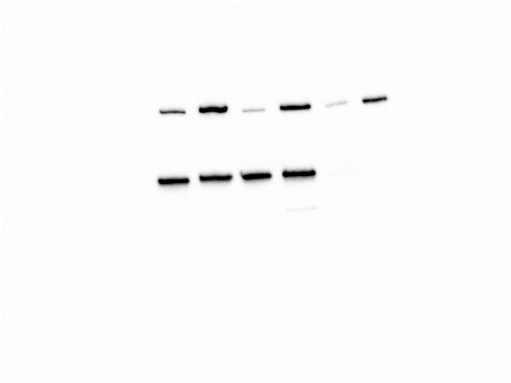

3<sup>rd</sup> Abs: Anti-FAP12 and anti-PLD

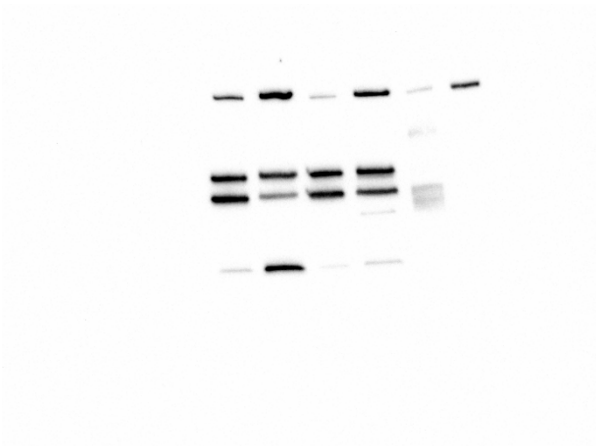

Exp1 Exp2  
FL reg FL reg (x Y)

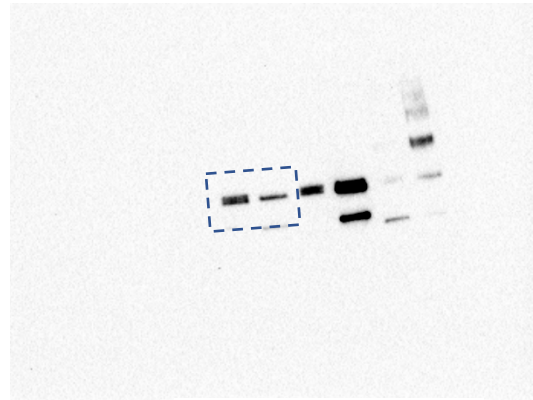

Exp1 Exp2  
FL reg FL reg (x Y)

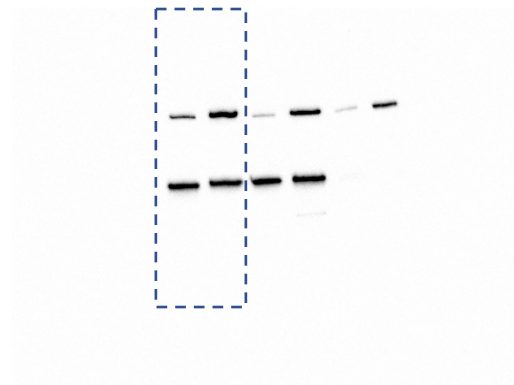

Exp1 Exp2  
FL reg FL reg (x Y)

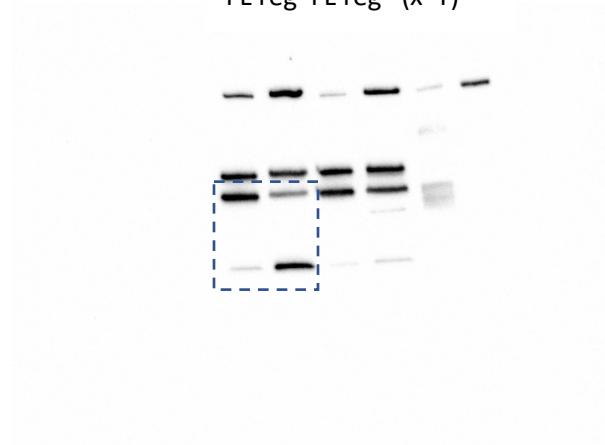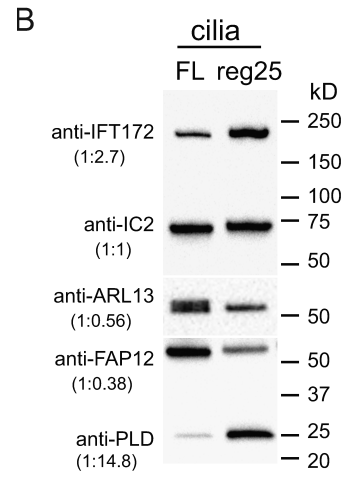

Fig. 5C (one membrane, 2 antibodies)

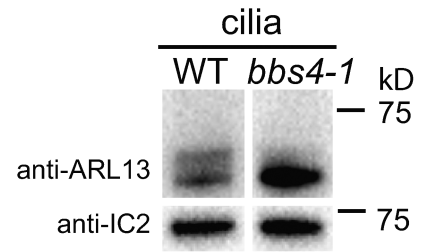

anti-ARL13

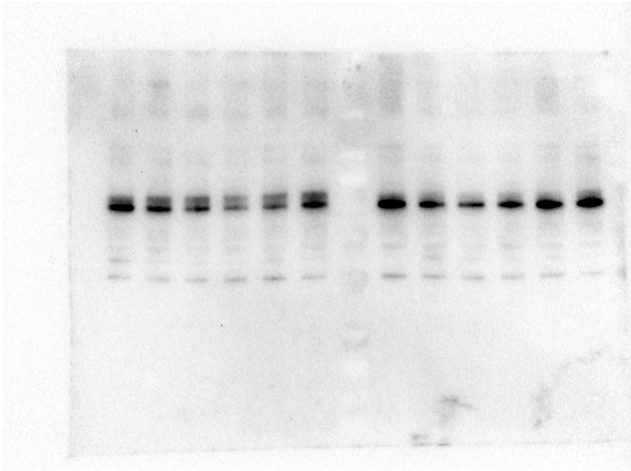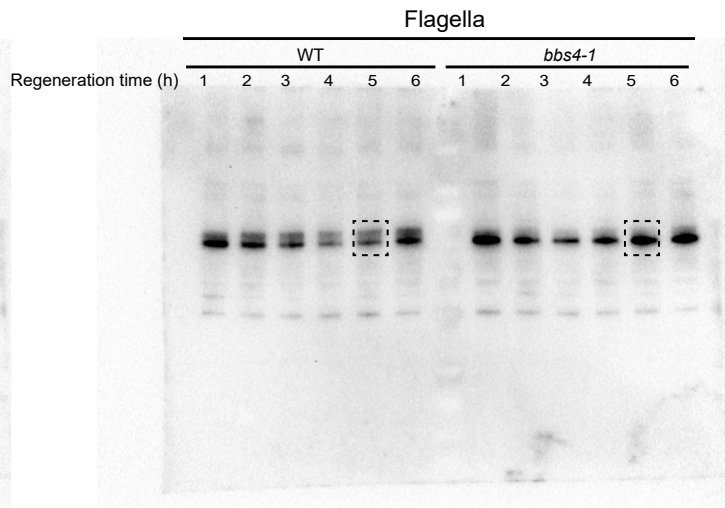

anti-IC2

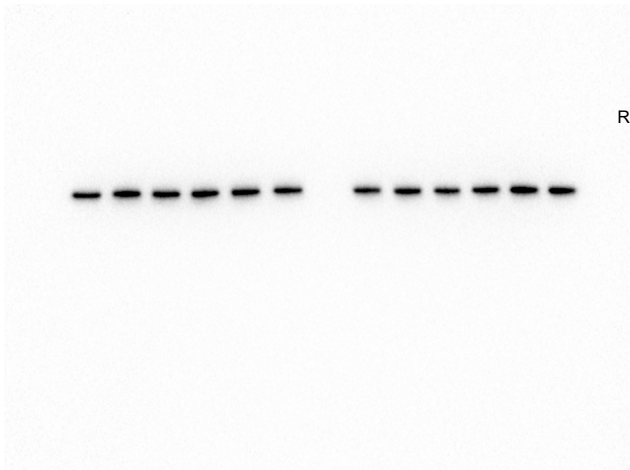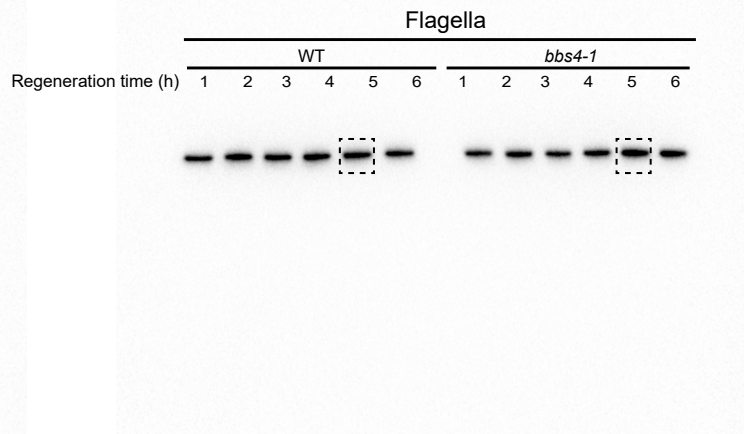

Figure 5D

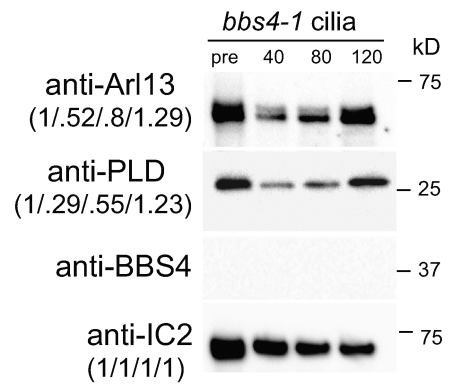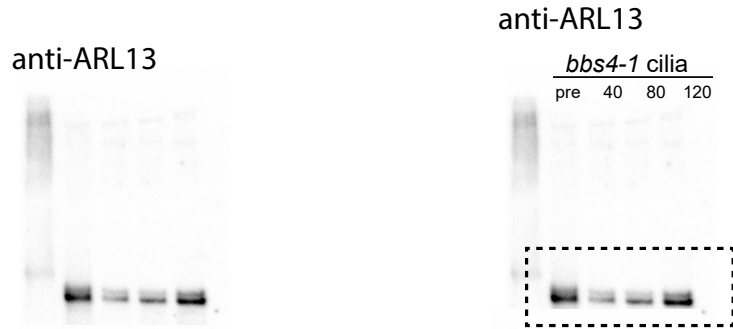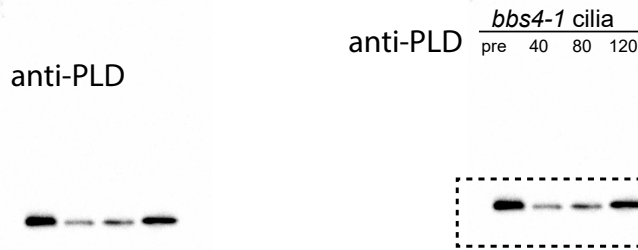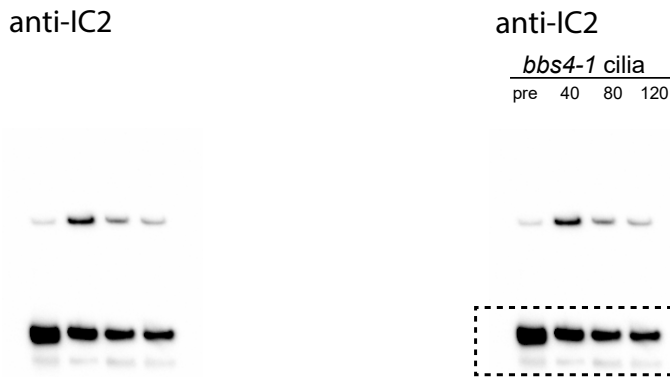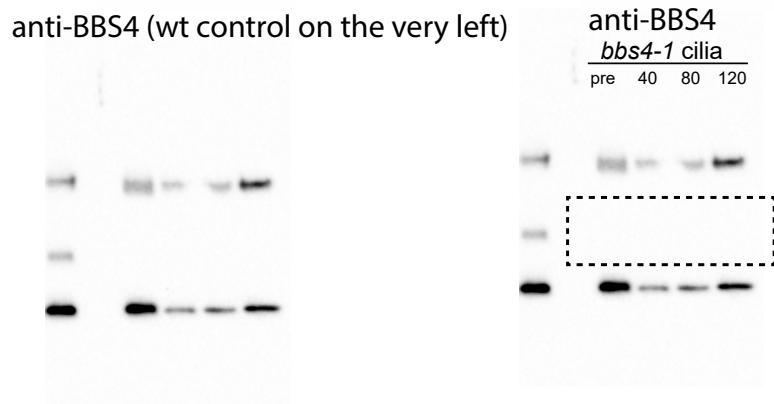

Fig 5E -Source file

(4 samples, 3 replica membranes)

1<sup>st</sup> Abs: Anti-ARL13 (left) and anti-BBS4 (middle)

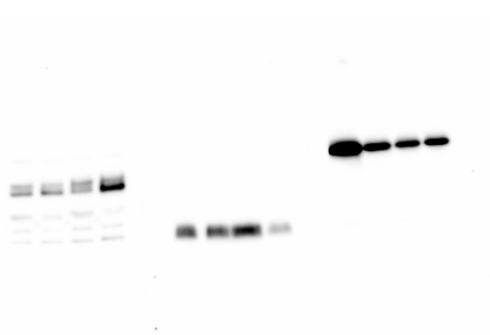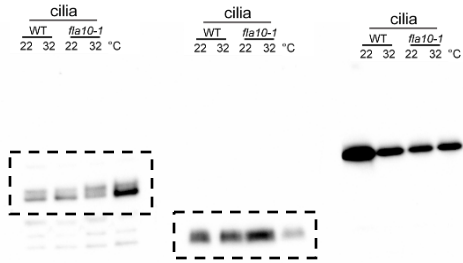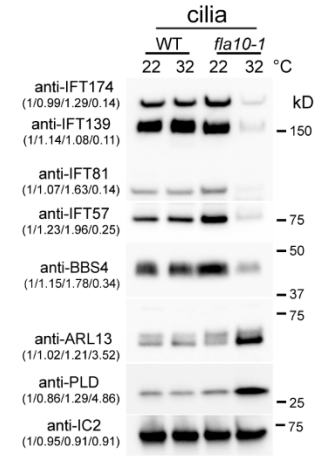

2<sup>nd</sup>ABS: left: anti-IFT174 & anti-IFT139 & anti-IFT81  
right: anti-PLD

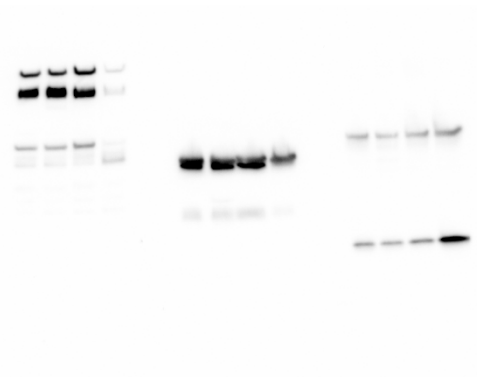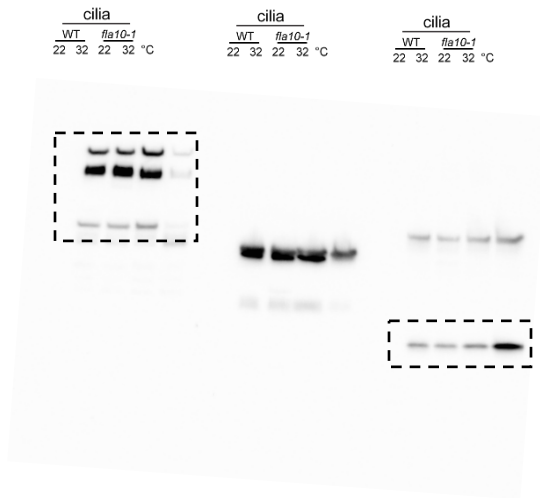

left: anti-IFT57; right: anti-IC2

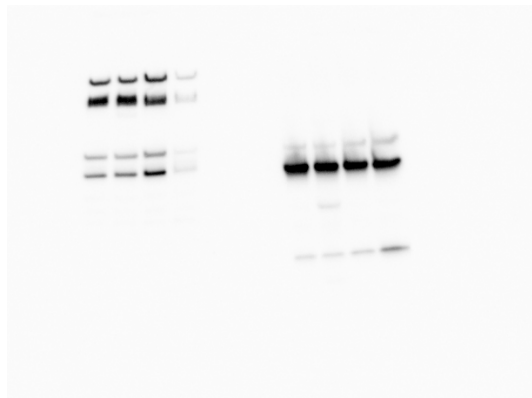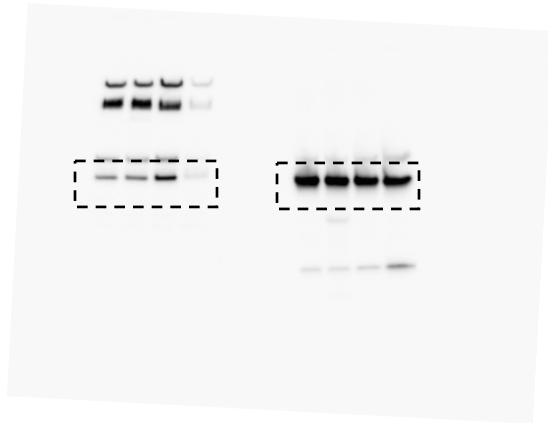

colorimetric

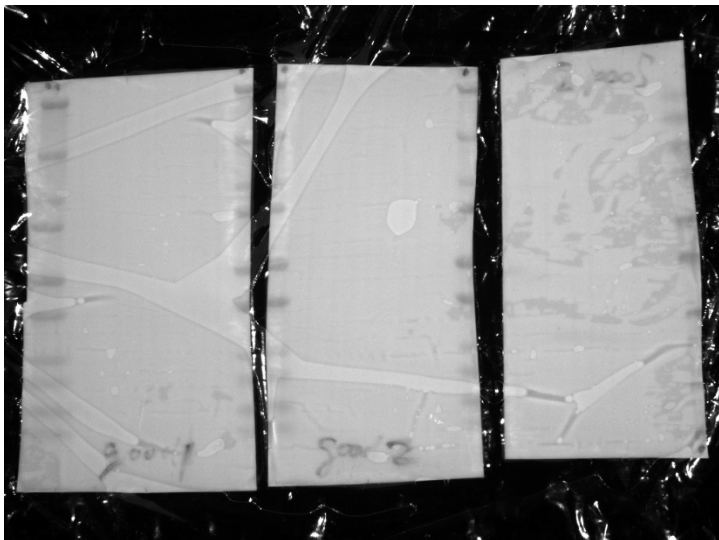

Colorimetric/blot overlay

Exp1 Exp2

FL reg FL reg (x Y)

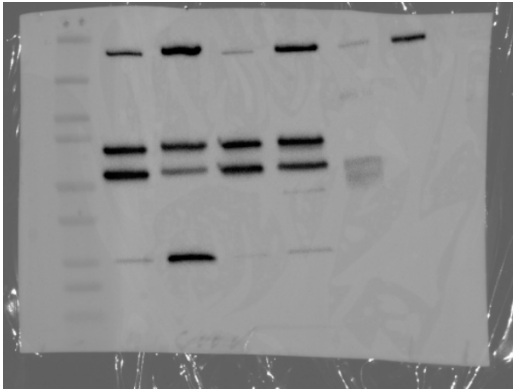

Supplement: JCB_202201050_SourceDataF5.pdf [file JCB_202201050_SourceDataF5.pdf]
