# Supplementary material for: Loss of ARL13 impedes BBSome-dependent cargo export from Chlamydomonas cilia
Source: PubMed Central journal article supplement — J Cell Biol. 2022 Aug 30;221(10):e202201050. doi: 10.1083/jcb.202201050 (PMC9436004; doi:10.1083/jcb.202201050), 2022-08-30

Figure S2C source file

loaded: cilia of control, control, *fap12*, *fap12*

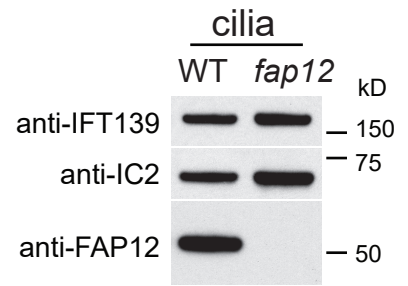

anti-FAP12

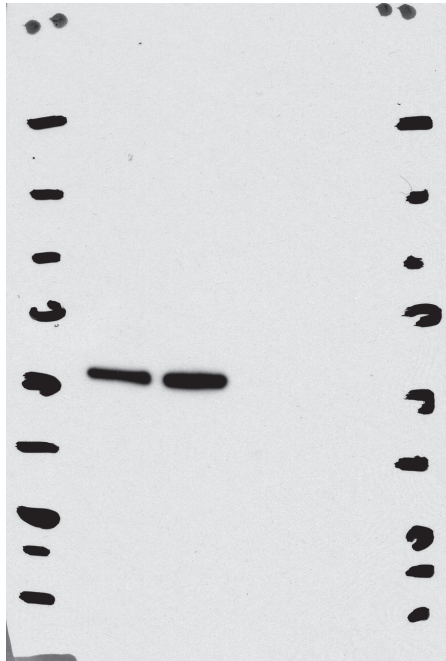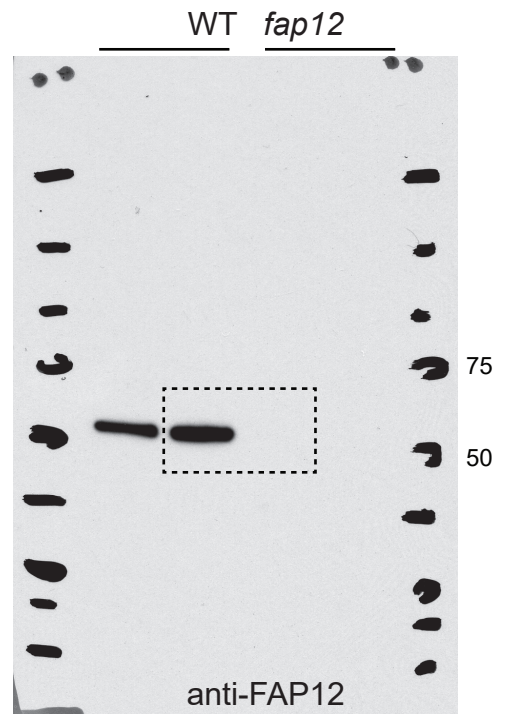

# Figure S2E

Loaded:  
WT, *arl13*, strain x, strain y

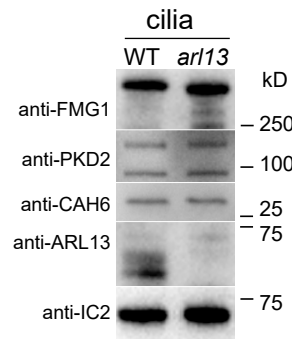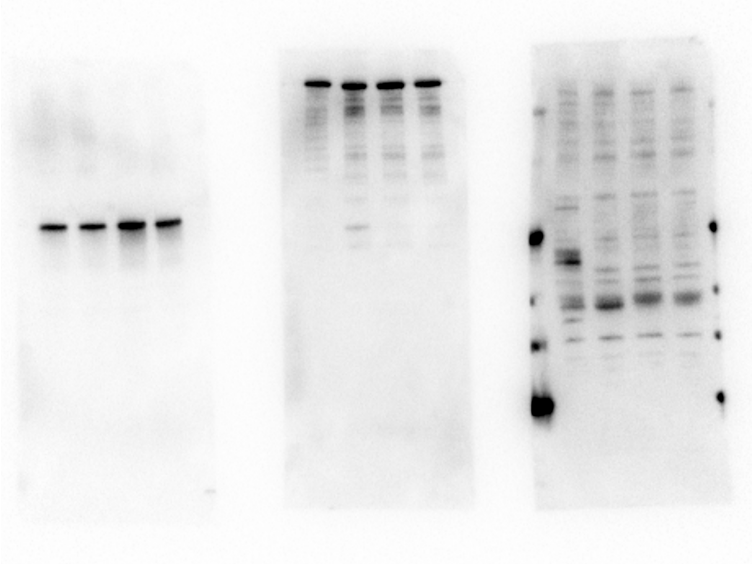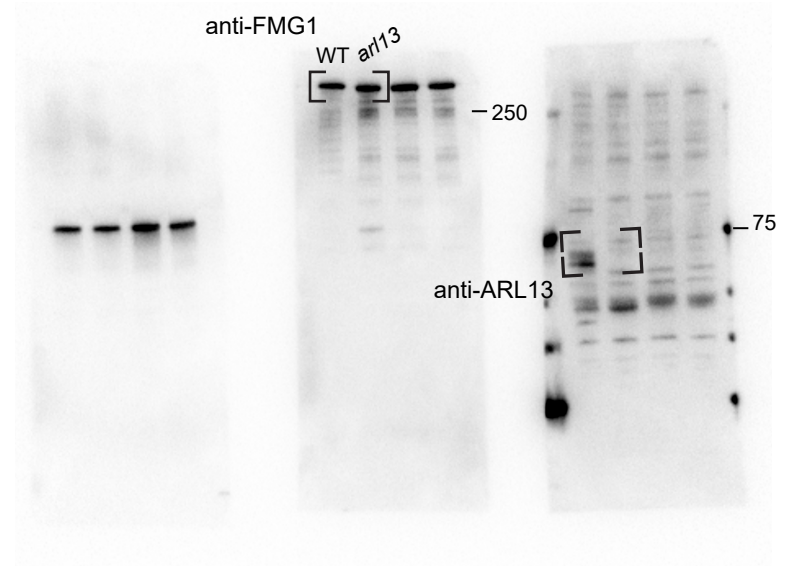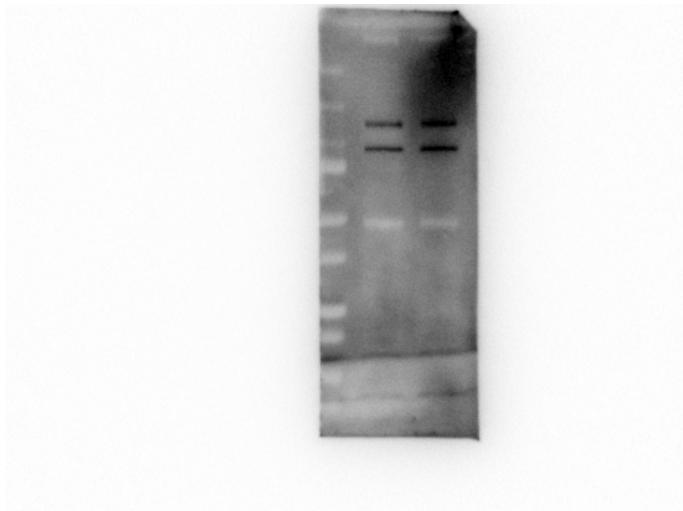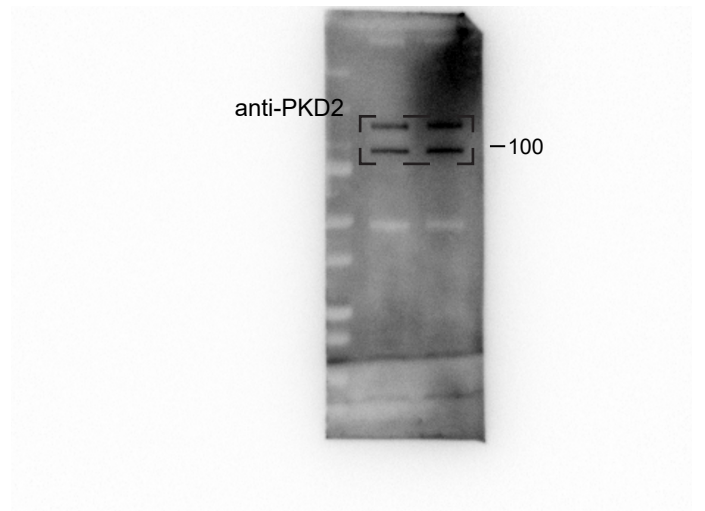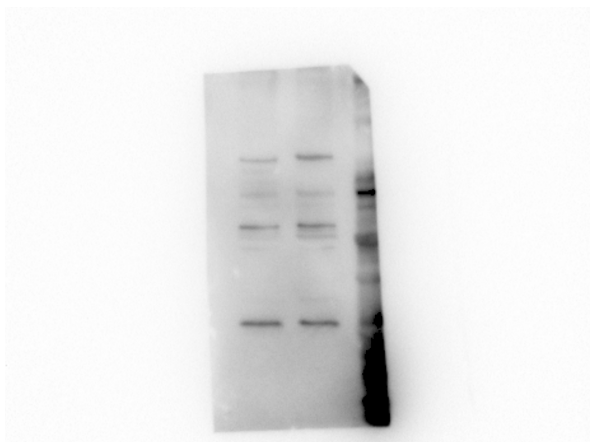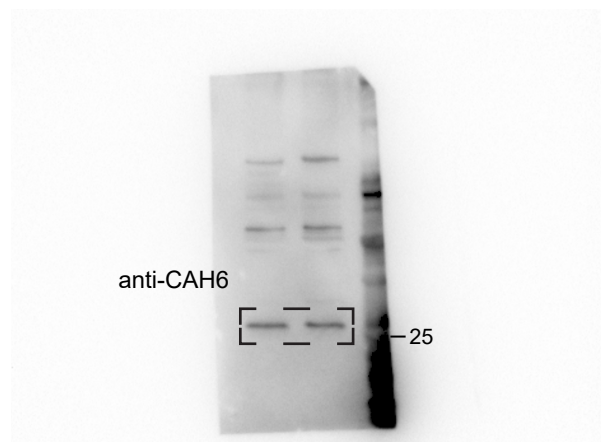

Figure S2E - part 2

**Loaded:**

WT, *arl13*, strain x, strain y

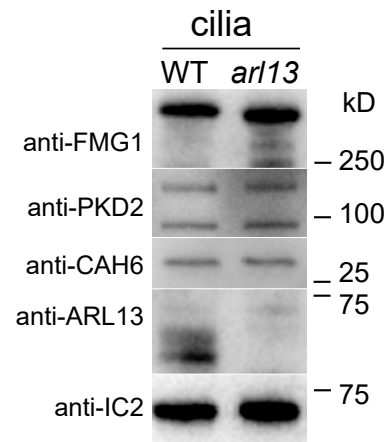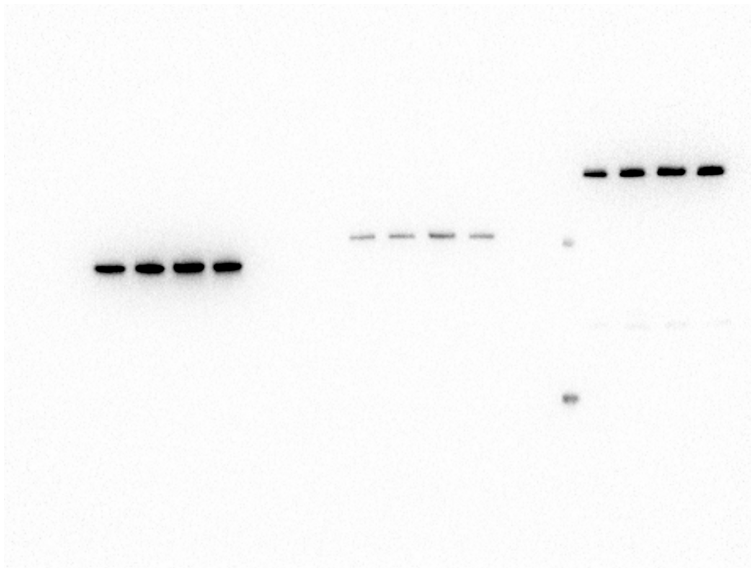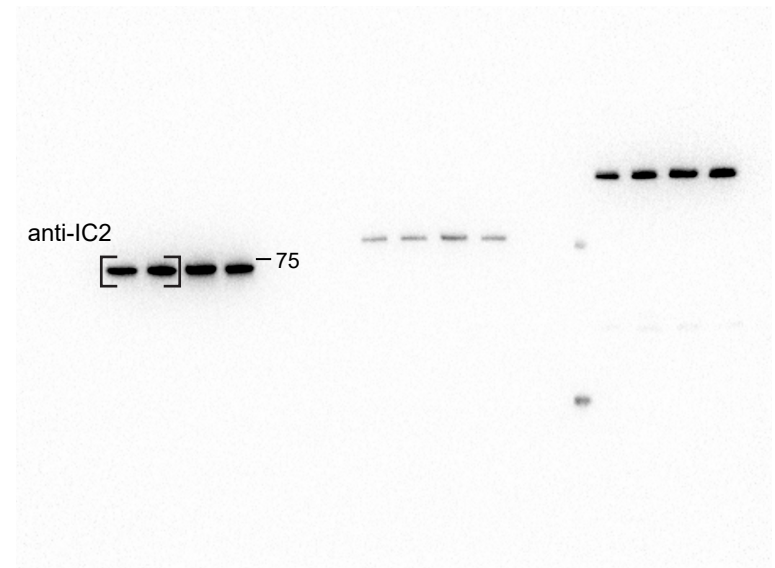

Figure S2F

**Loaded:**

WT, arl13, strain x, strain y, strain z, bbs4-1

**Membrane 1**

1<sup>st</sup> ab: anti-PKD2

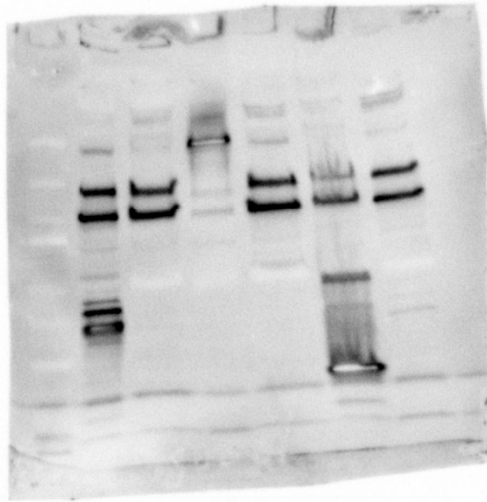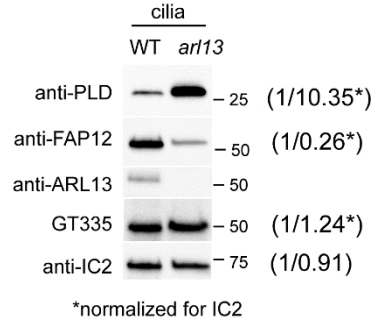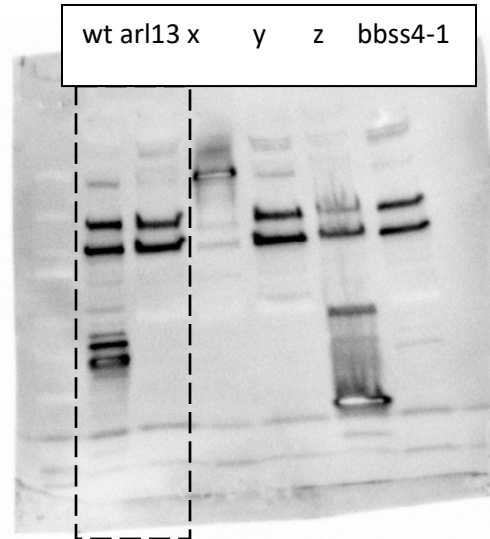

2<sup>nd</sup> ab: anti-GT335

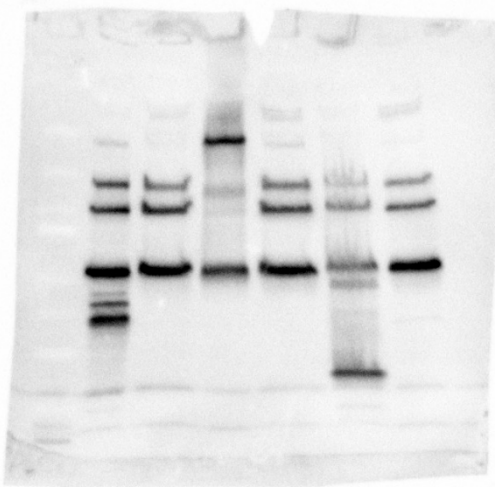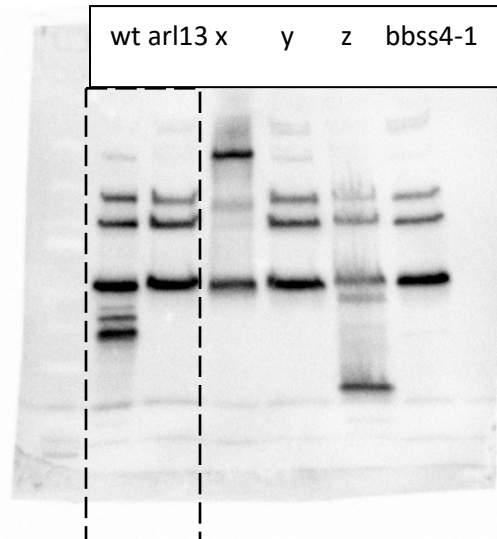

Figure S2F

Membrane 2

1<sup>st</sup> ab: anti-FAP12

2<sup>nd</sup> ab: Anti-IC2

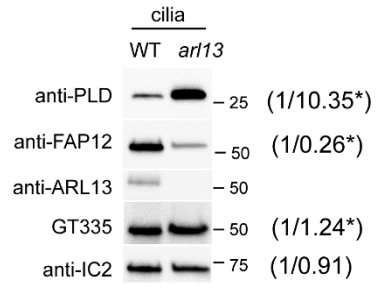

\*normalized for IC2

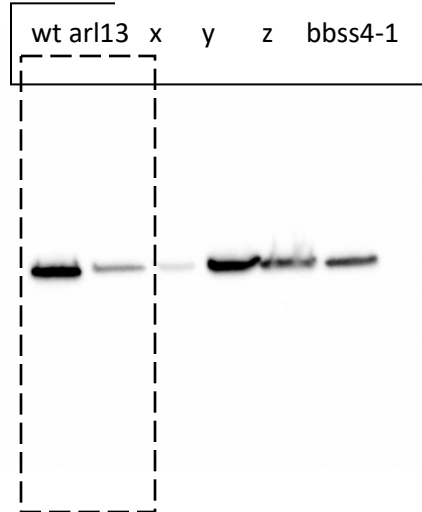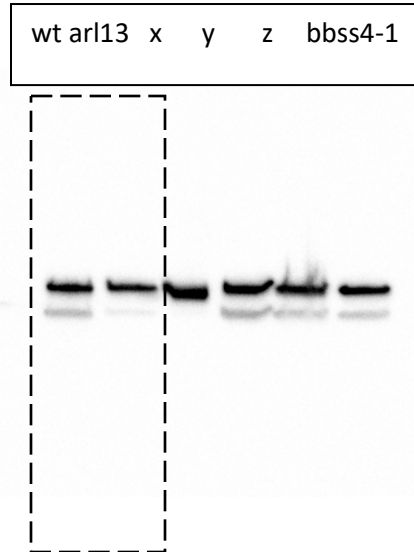

Fig. S2F

Membrane 3

2<sup>nd</sup> AB: anti-PLD

(1<sup>st</sup> AB: anti-IFT81 – not shown)

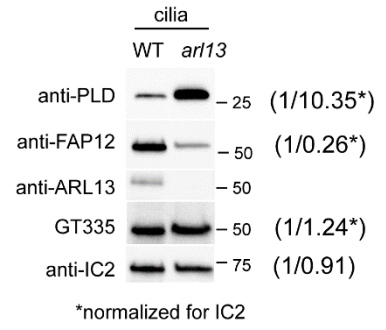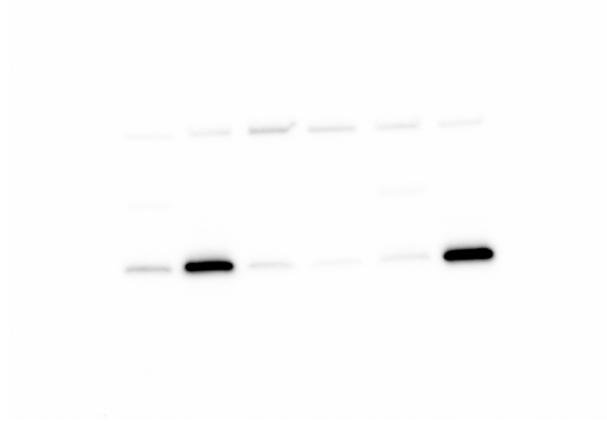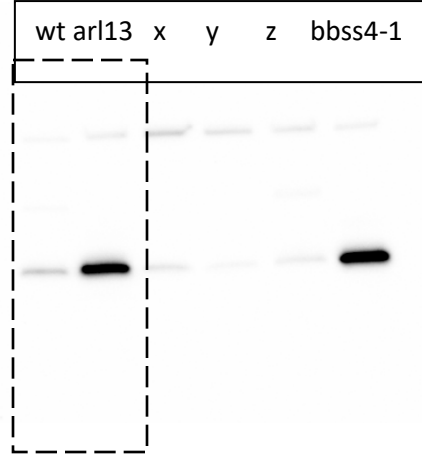

3<sup>rd</sup> AB: anti-ARL13

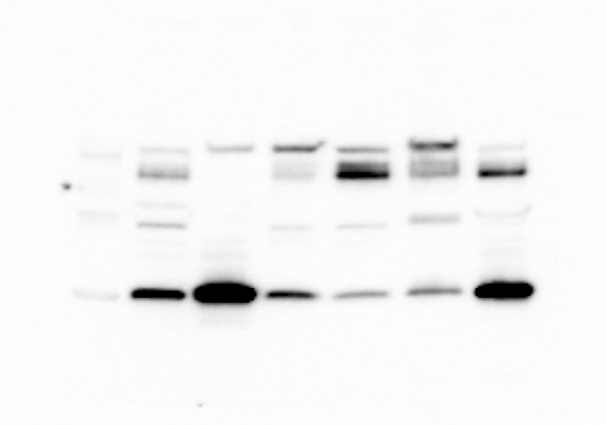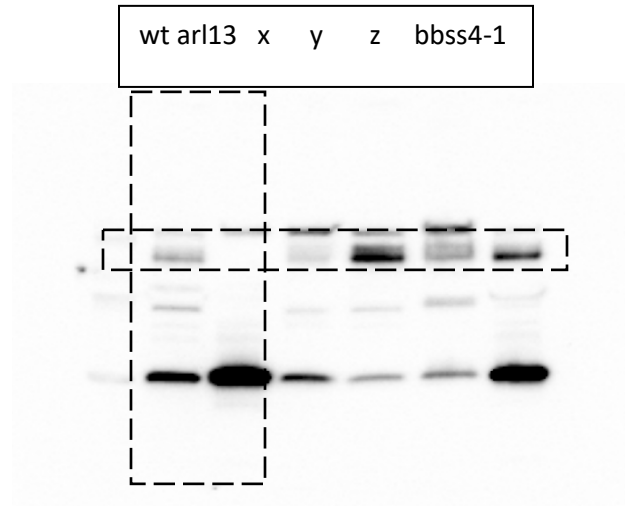

# Figure S2G

## Loaded:

WT, *arl13*, *bbs4-1*, strain x, strain y

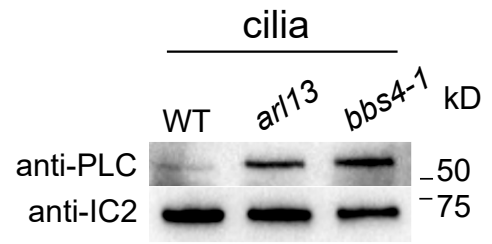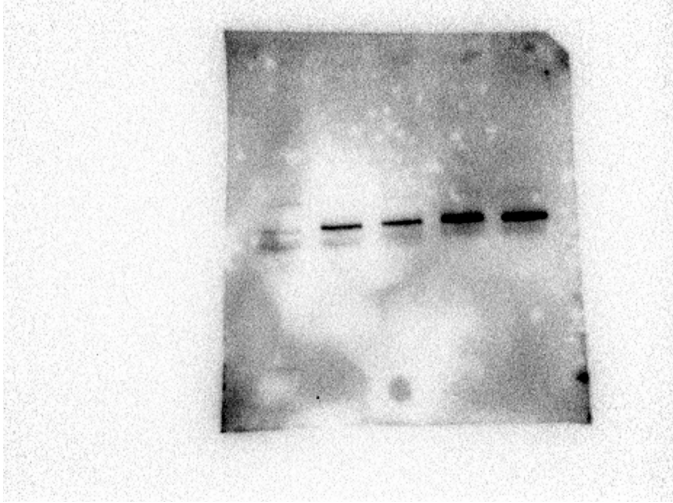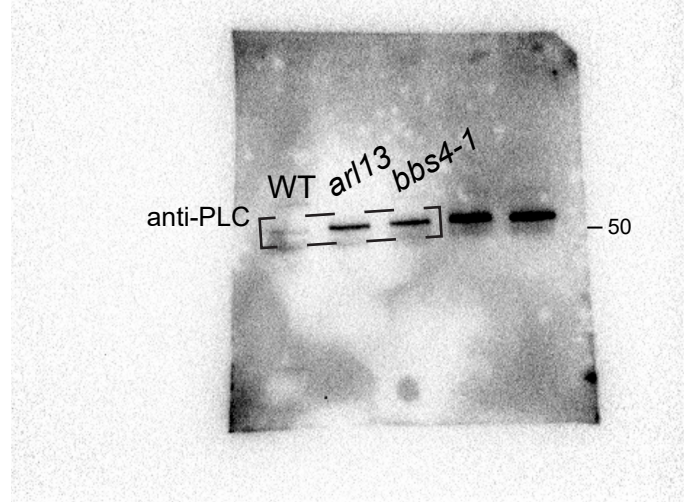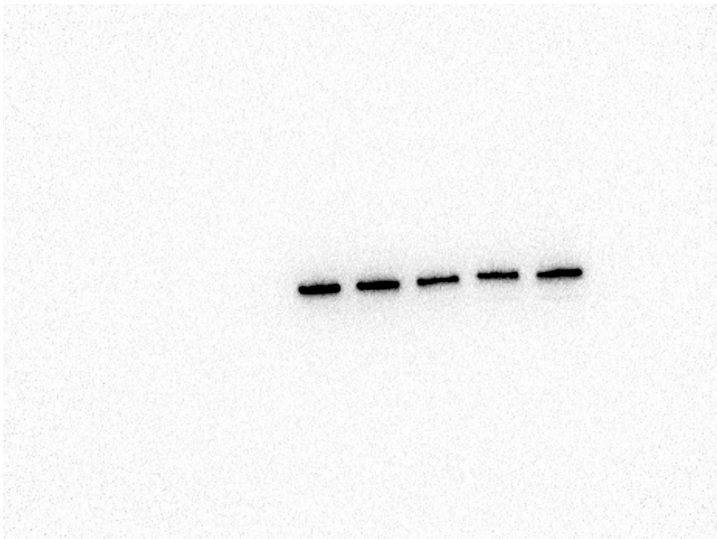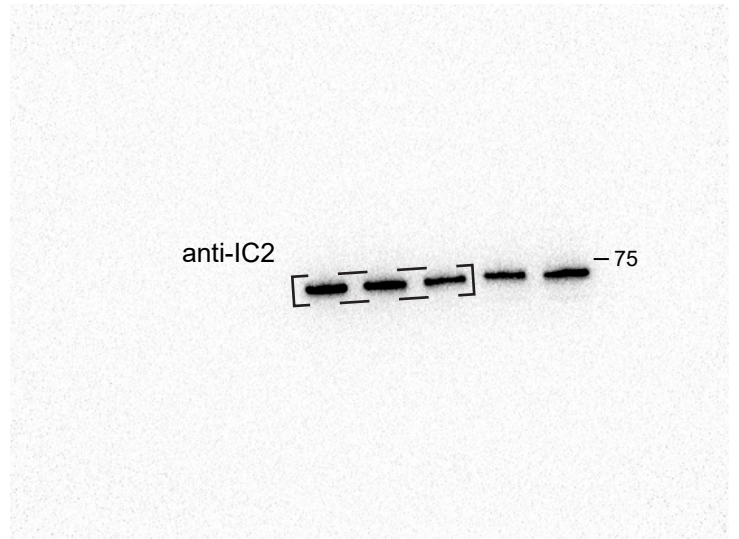

# Figure S2H

**Loaded:**  
WT, *arl13*

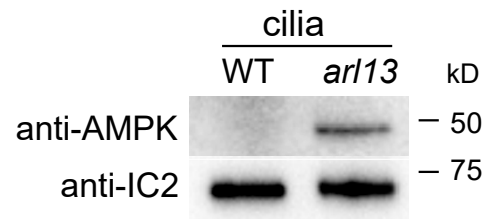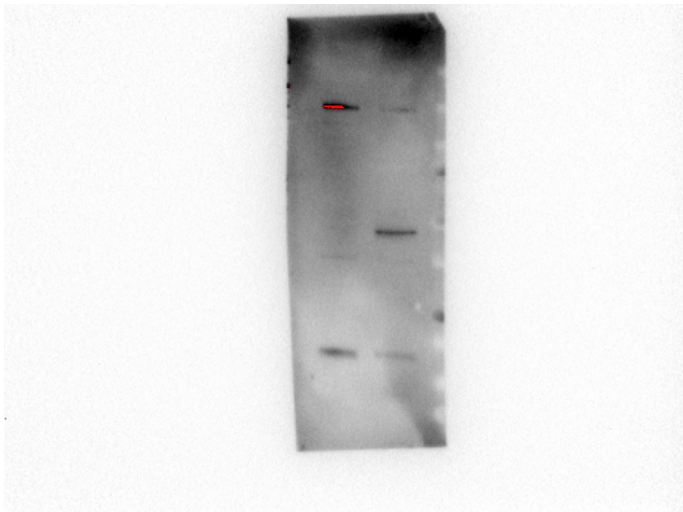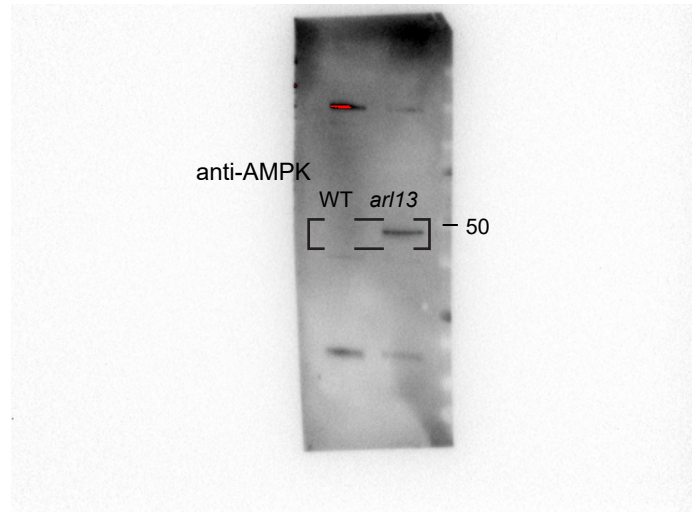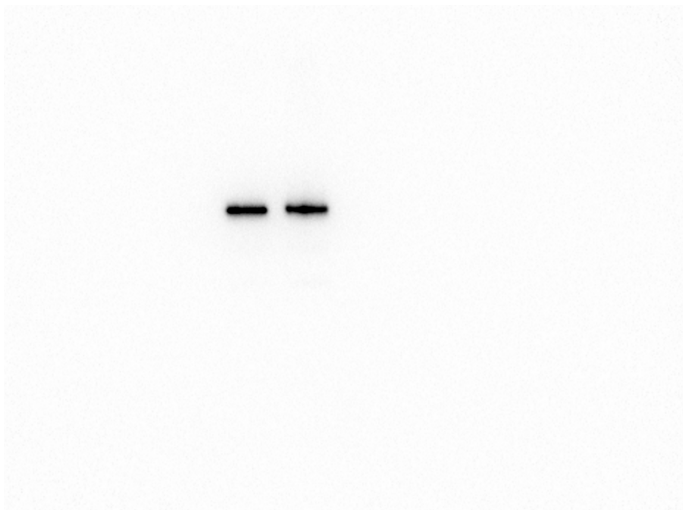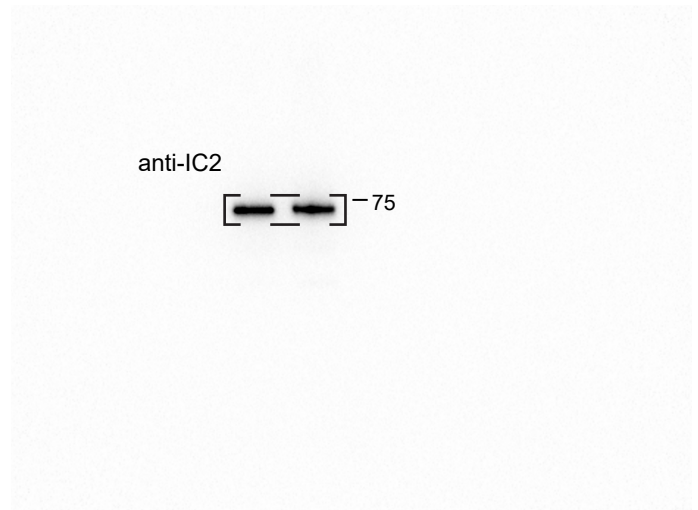



# Figure S2I

## Loaded:

WT, *bbs4-1 arl13*, *bbs4-1 arl13 ARL13-NG*, *arl13 ARL13-NG*, strain x

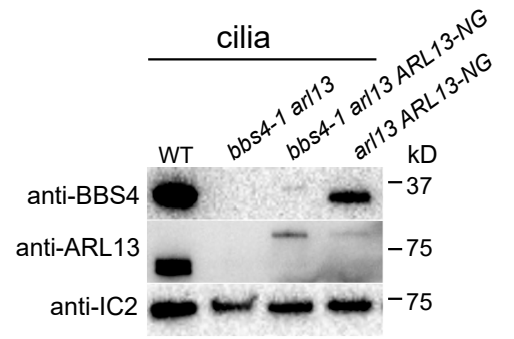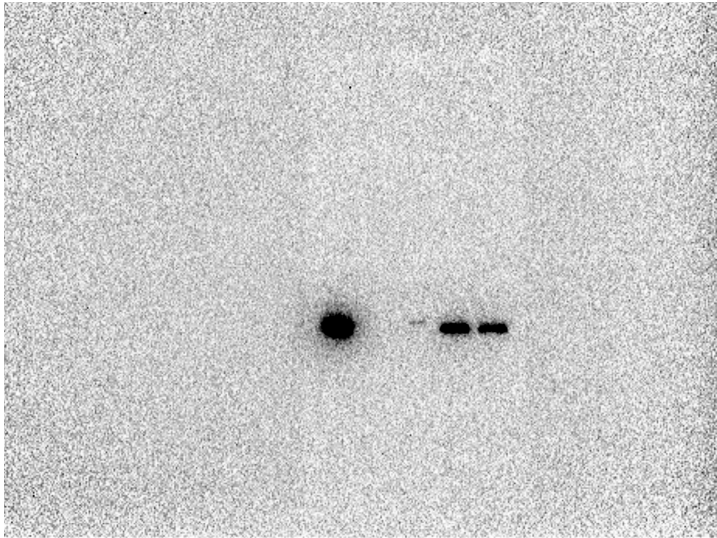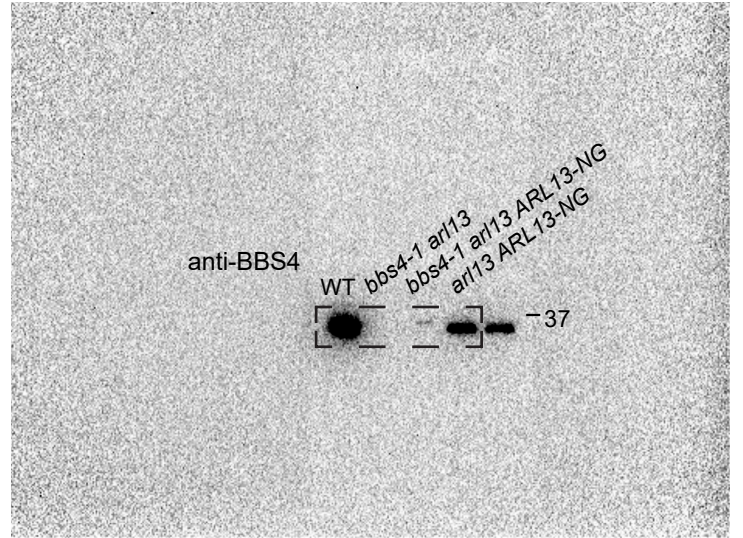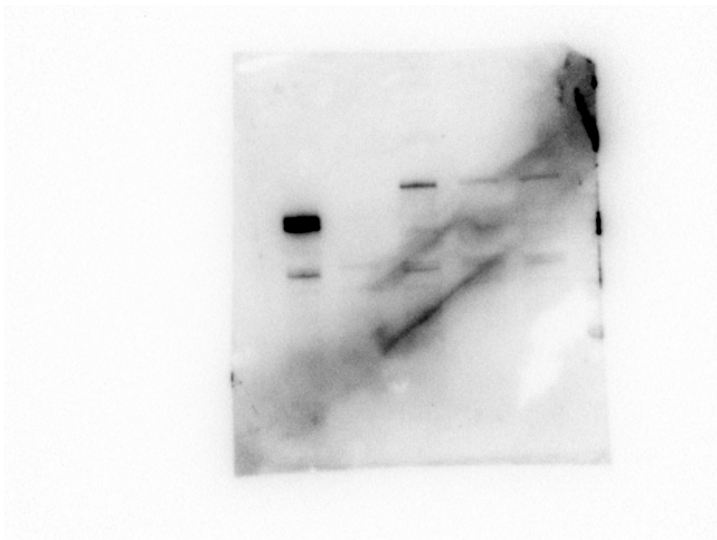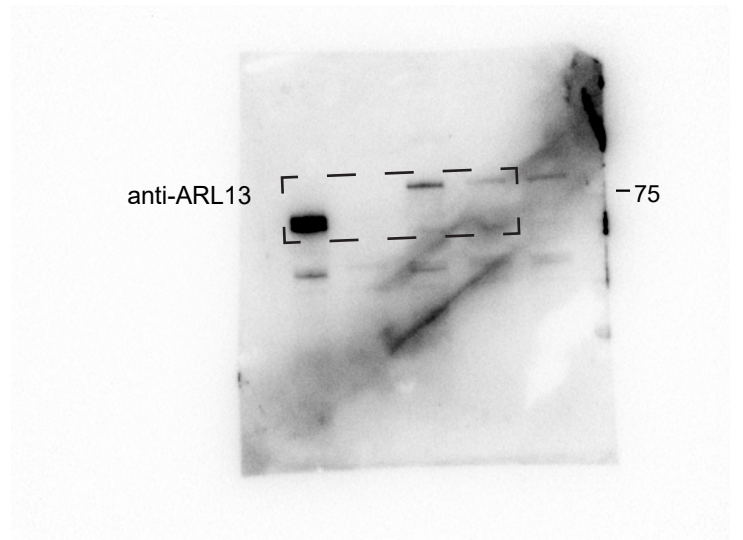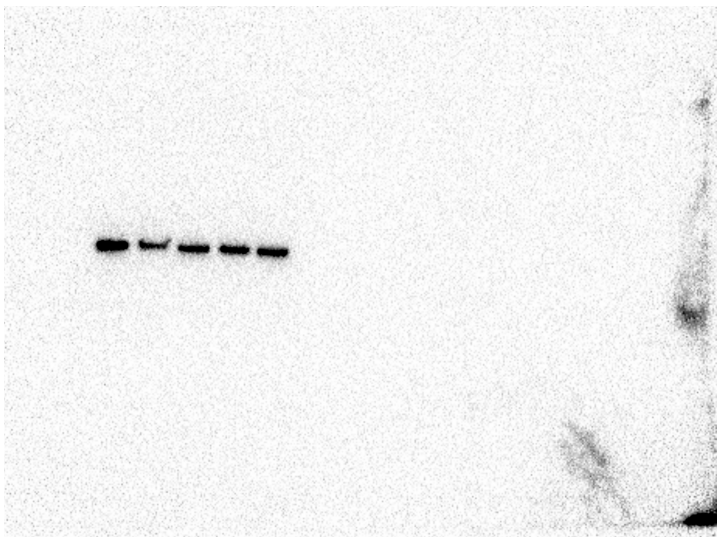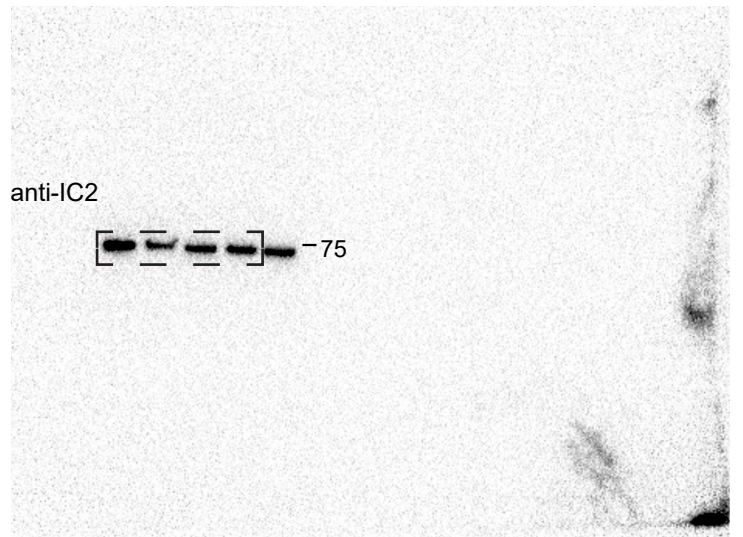

Supplement: JCB_202201050_SourceDataFS2.pdf [file JCB_202201050_SourceDataFS2.pdf]
