# Supplementary material for: Loss of ARL13 impedes BBSome-dependent cargo export from Chlamydomonas cilia
Source: PubMed Central journal article supplement — J Cell Biol. 2022 Aug 30;221(10):e202201050. doi: 10.1083/jcb.202201050 (PMC9436004; doi:10.1083/jcb.202201050), 2022-08-30

Figure S1H

**Loaded:**

WT cilia, axoneme, matrix (4x), membrane (20x)

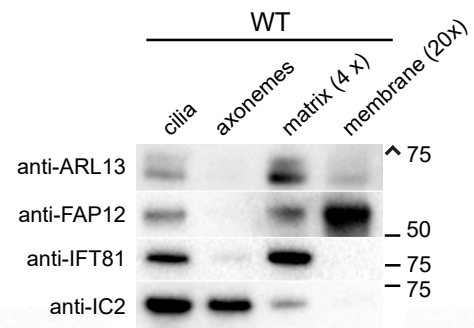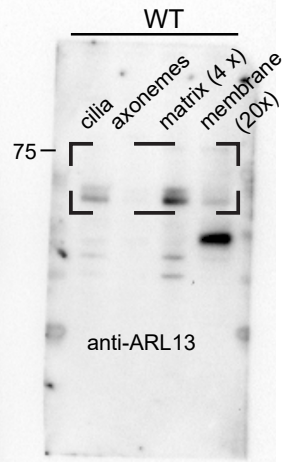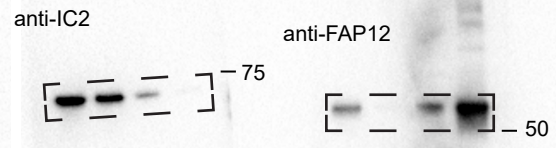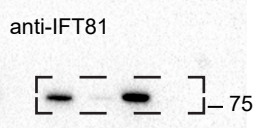

Figure S11

**Loaded:**

WT cilia, axoneme, matrix (4x), membrane (20x)

WT+GTPyS cilia, axoneme, matrix (4x), membrane (20x)

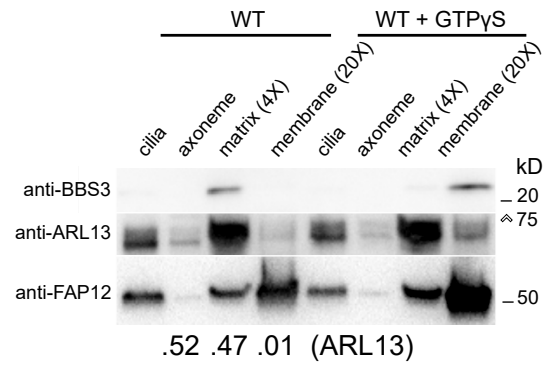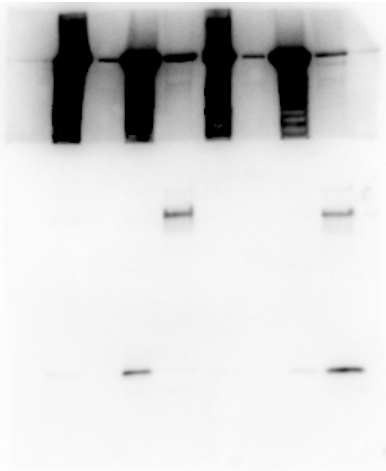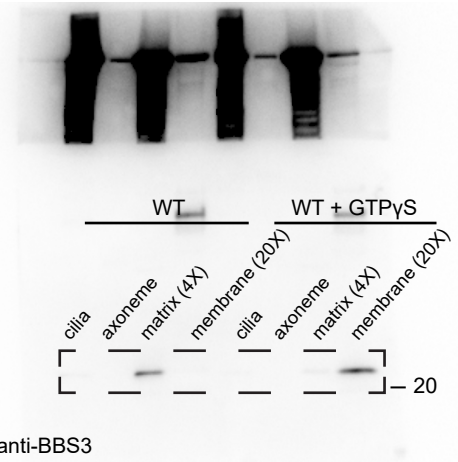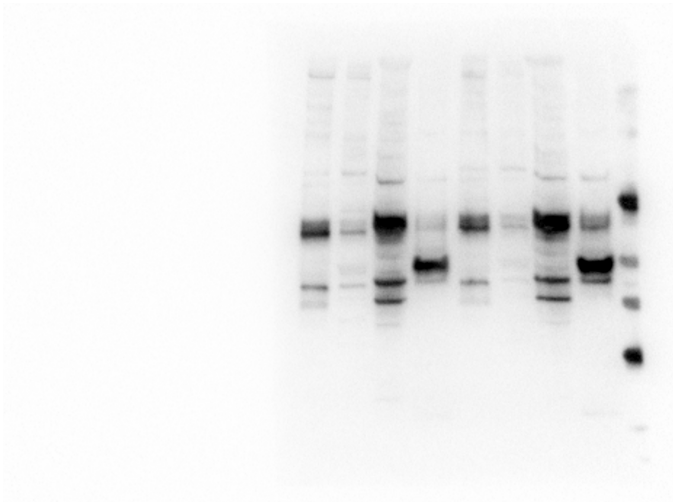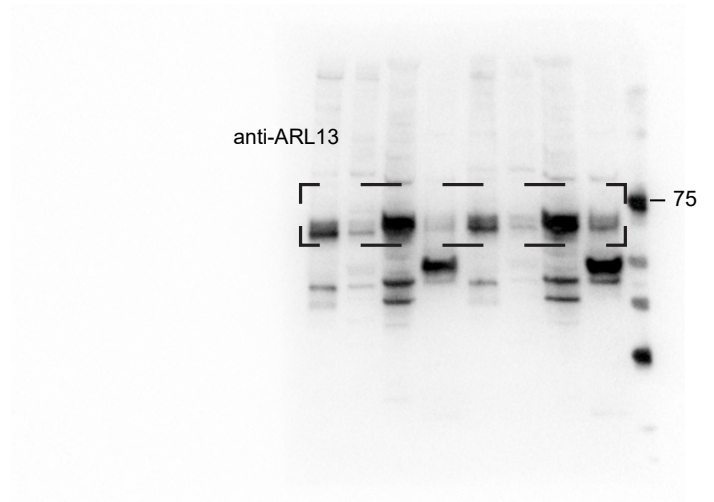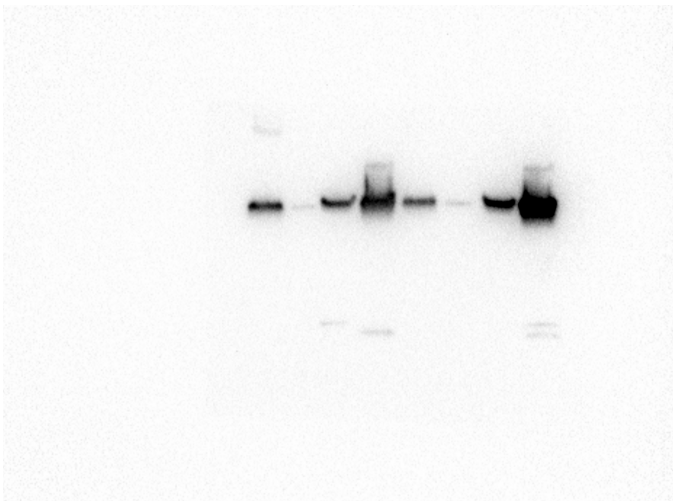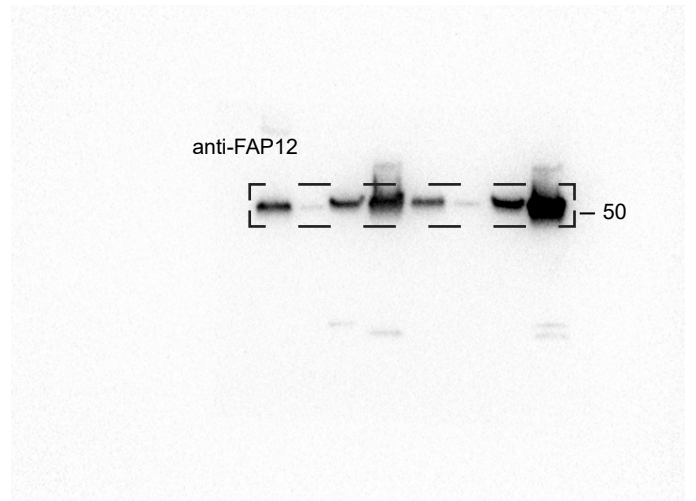

Supplement: JCB_202201050_SourceDataFS1.pdf [file JCB_202201050_SourceDataFS1.pdf]
