# Supplementary material for: Loss of ARL13 impedes BBSome-dependent cargo export from Chlamydomonas cilia
Source: PubMed Central journal article supplement — J Cell Biol. 2022 Aug 30;221(10):e202201050. doi: 10.1083/jcb.202201050 (PMC9436004; doi:10.1083/jcb.202201050), 2022-08-30

Source file Fig. S3B

Coomassie

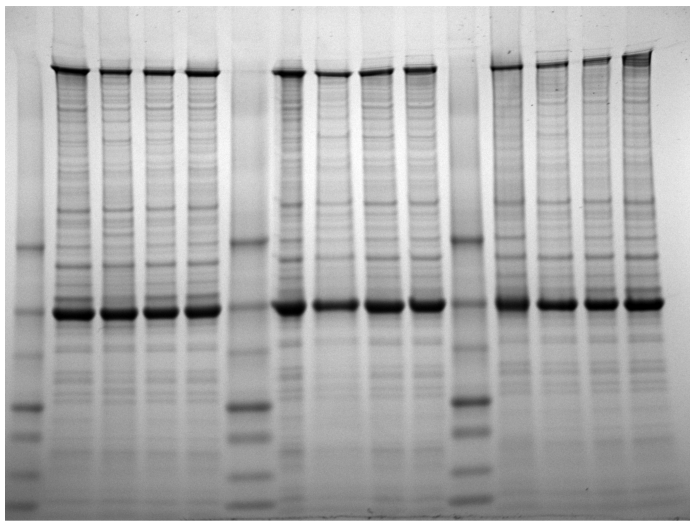

anti-PLD

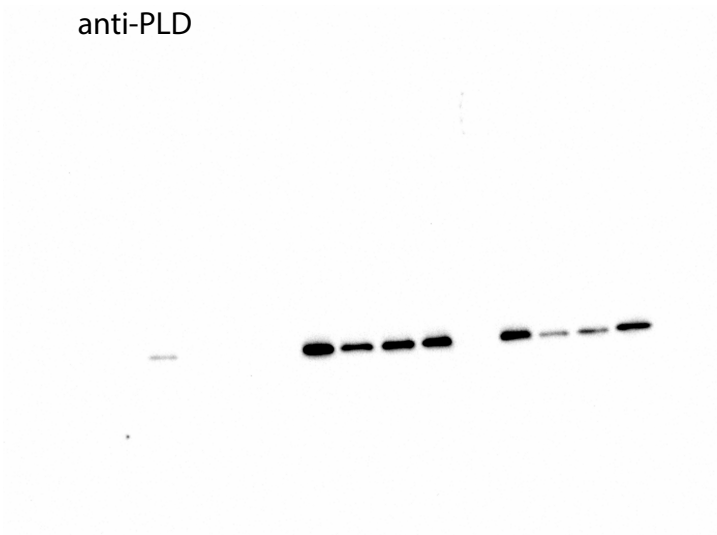

B

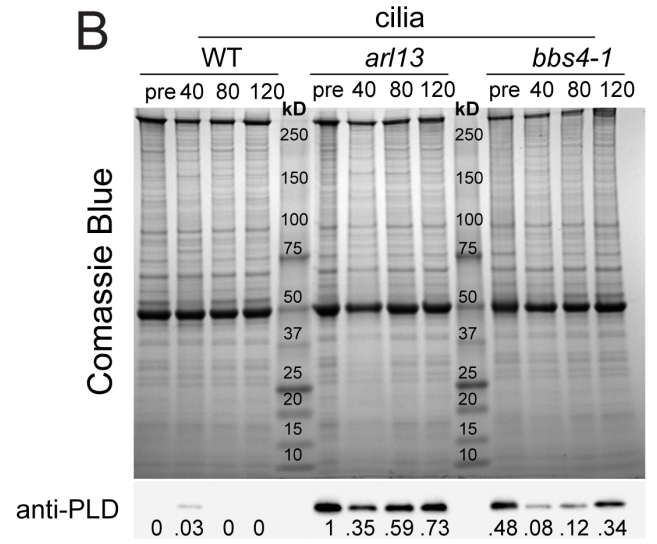

WT *arl13* *bbs4-1*  
pre 40 80 120 pre 40 80 120 pre 40 80 120

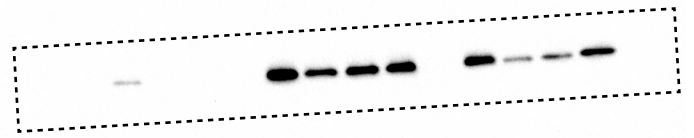

Figure S3F

**Loaded:**

WT, *arl13*, *bbs4-1*, *arl13 bbs4-1*, strain x

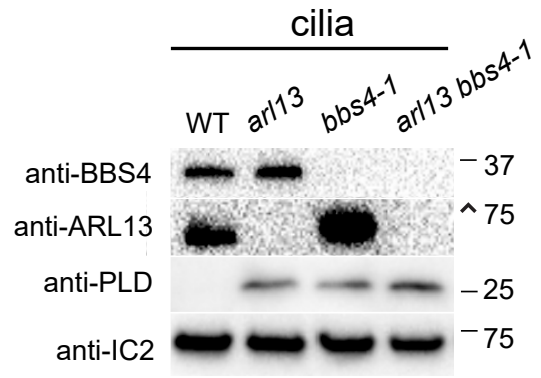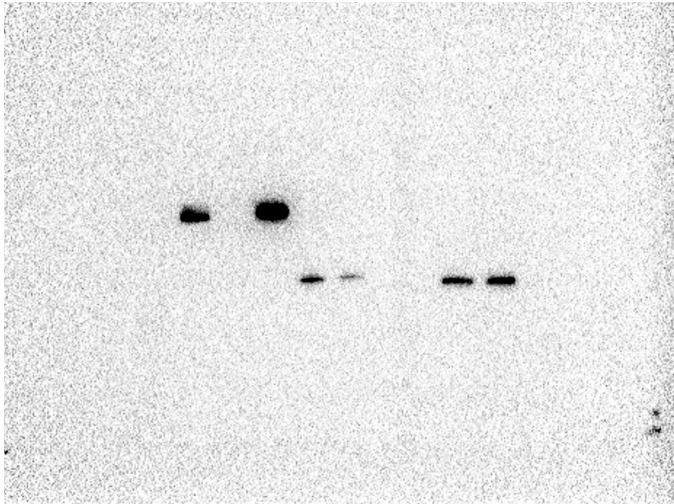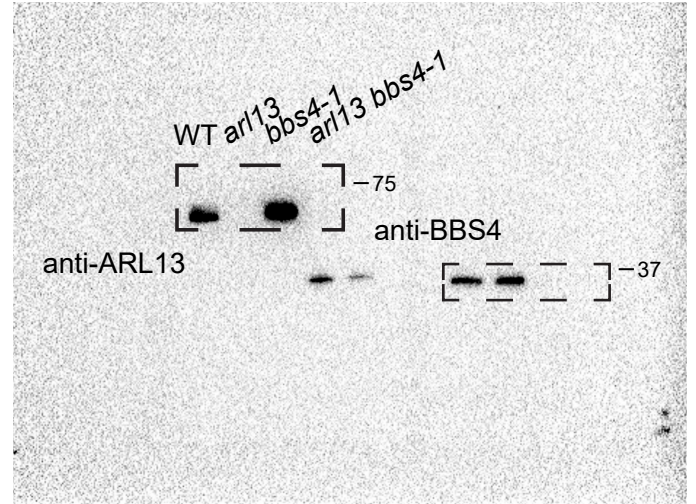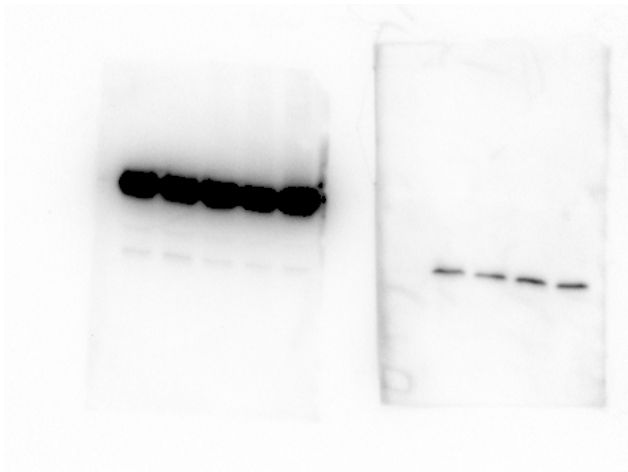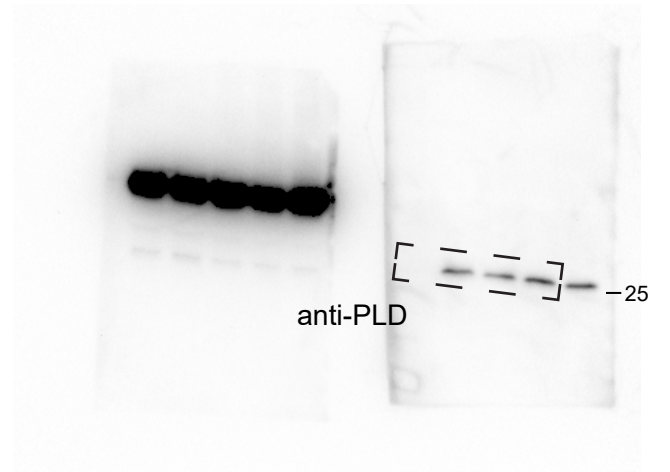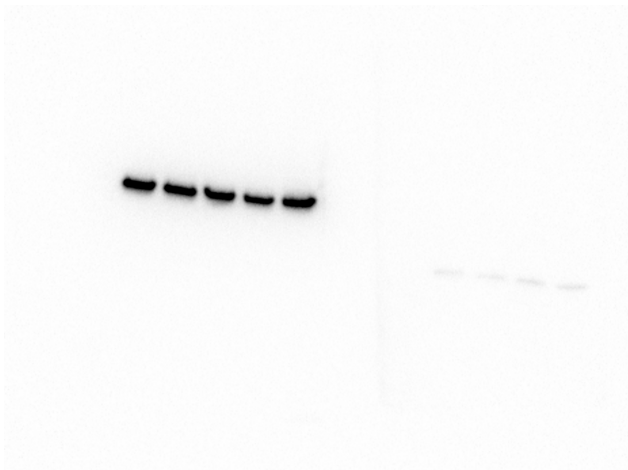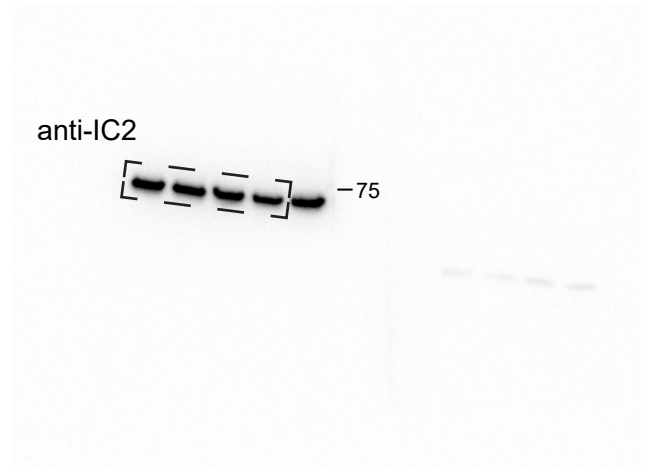

Supplement: JCB_202201050_SourceDataFS3.pdf [file JCB_202201050_SourceDataFS3.pdf]
