# Supplementary figures and images for: Loss of ARL13 impedes BBSome-dependent cargo export from Chlamydomonas cilia
Source: PubMed Central journal article supplement — J Cell Biol. 2022 Aug 30;221(10):e202201050. doi: 10.1083/jcb.202201050 (PMC9436004; doi:10.1083/jcb.202201050), 2022-08-30

Figure 2A

**Loaded:**  
WT, *arl13*, strain x, strain y  
3 blots per image

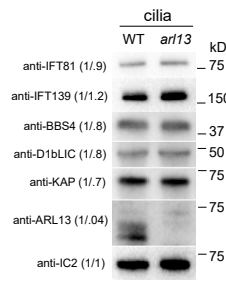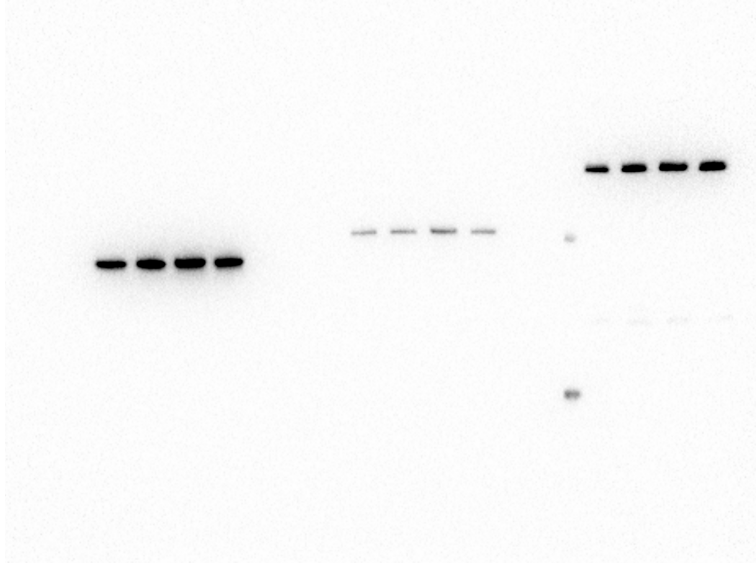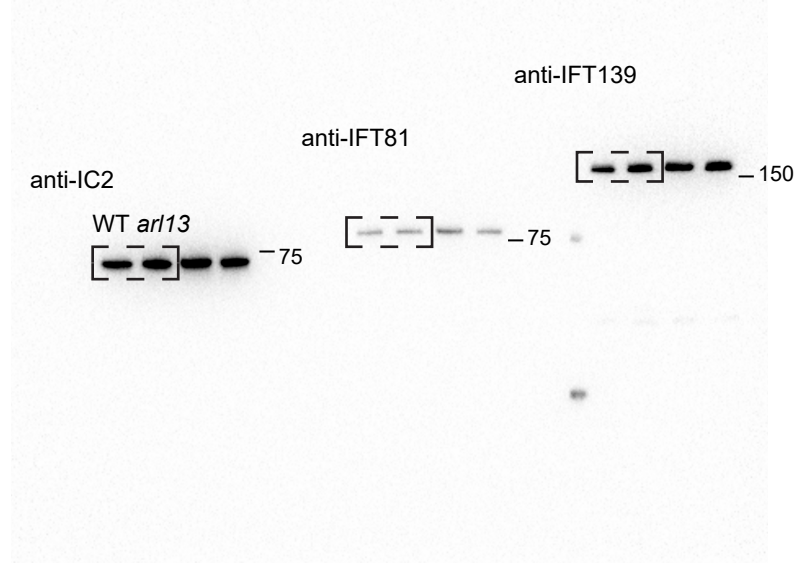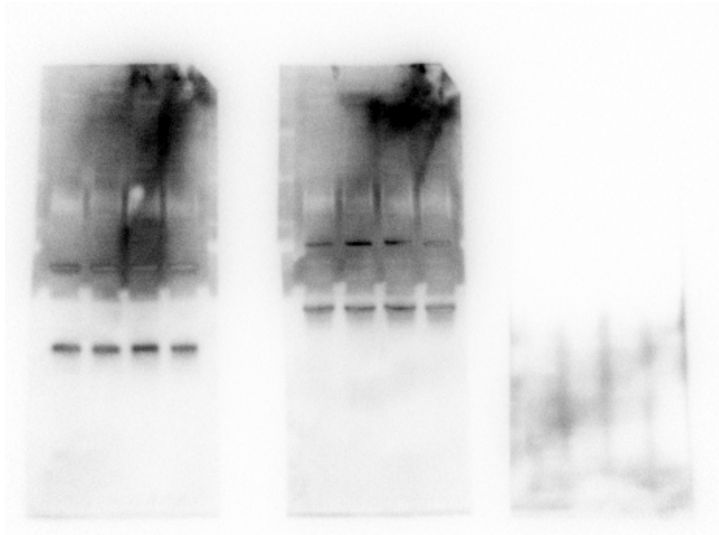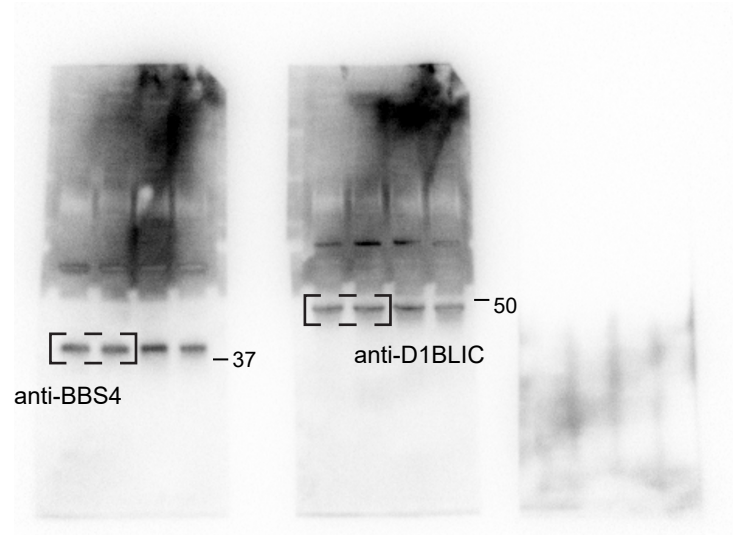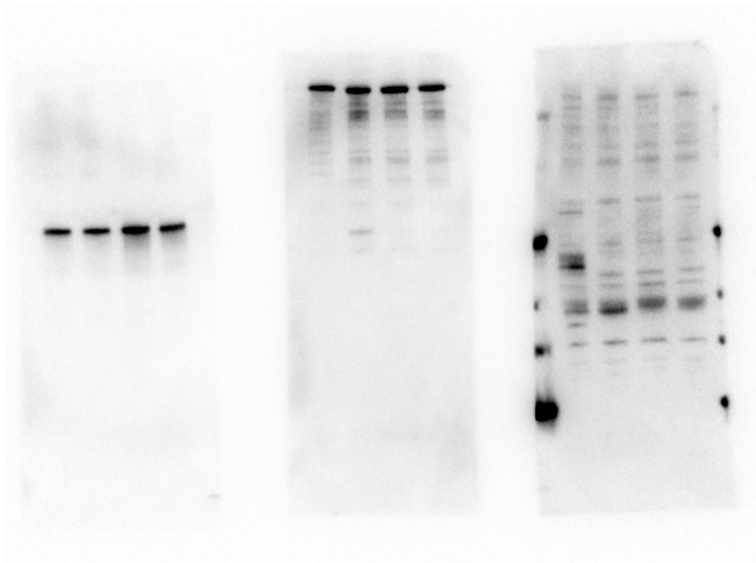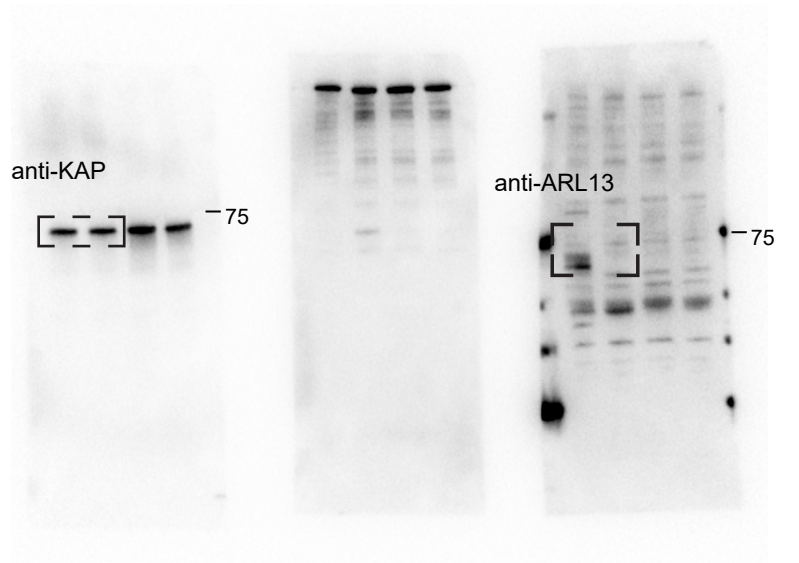

Supplement: JCB_202201050_SourceDataF2.pdf [file JCB_202201050_SourceDataF2.pdf]

Figure S5B

Loaded:  
WT, *arl13*, strain *x*, *bbs3*

cilia

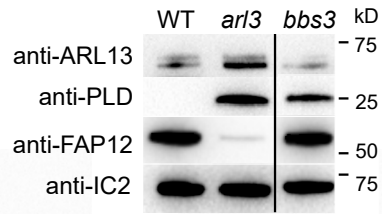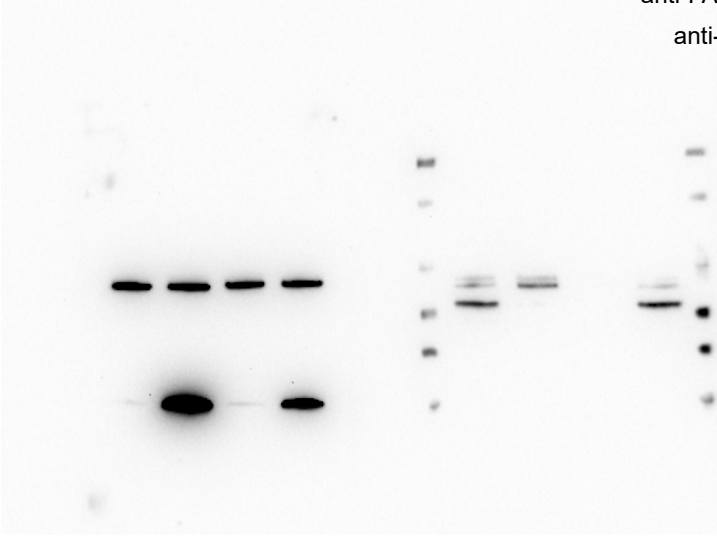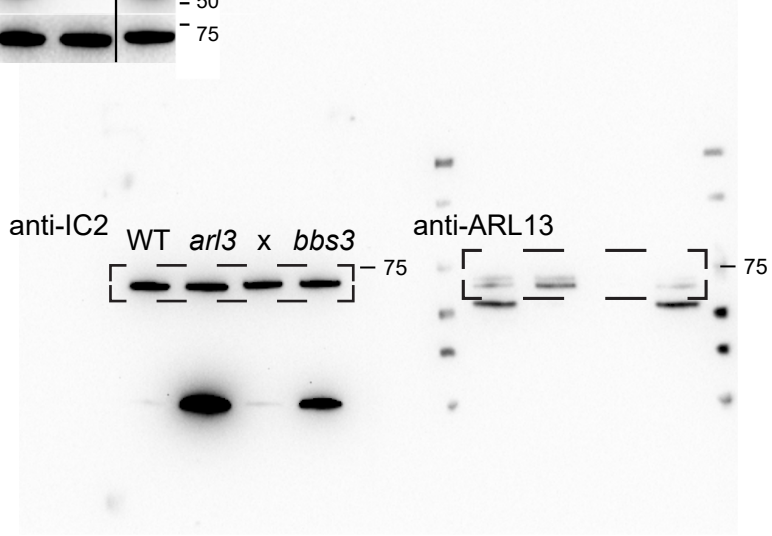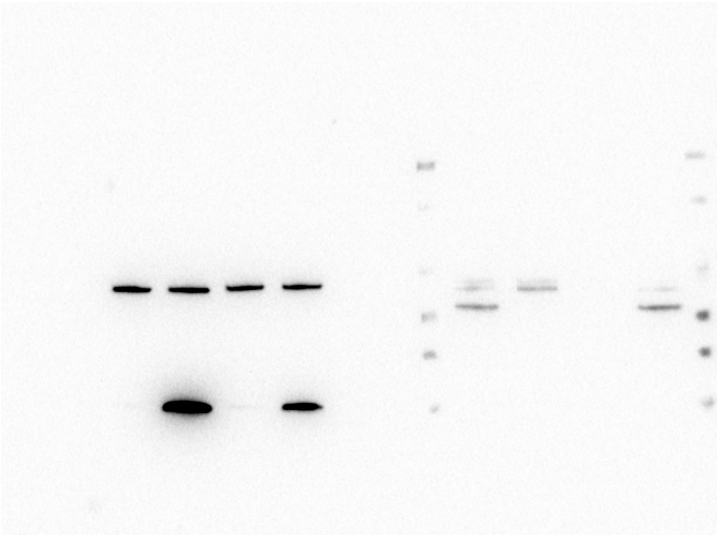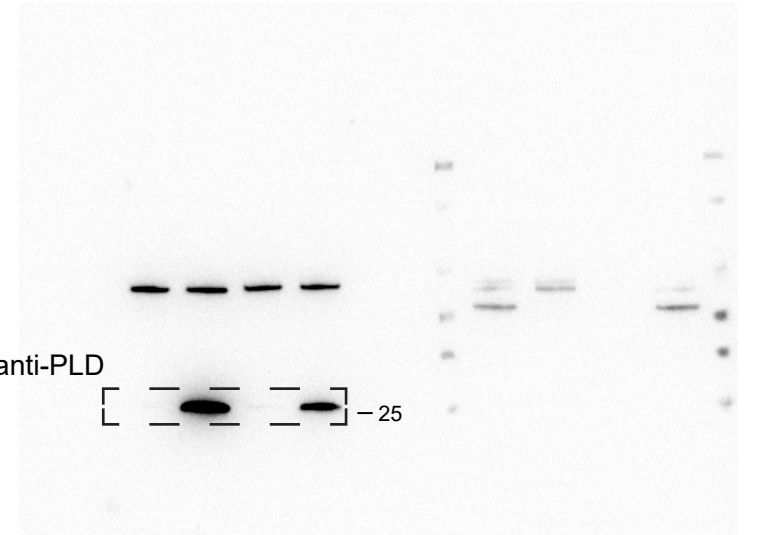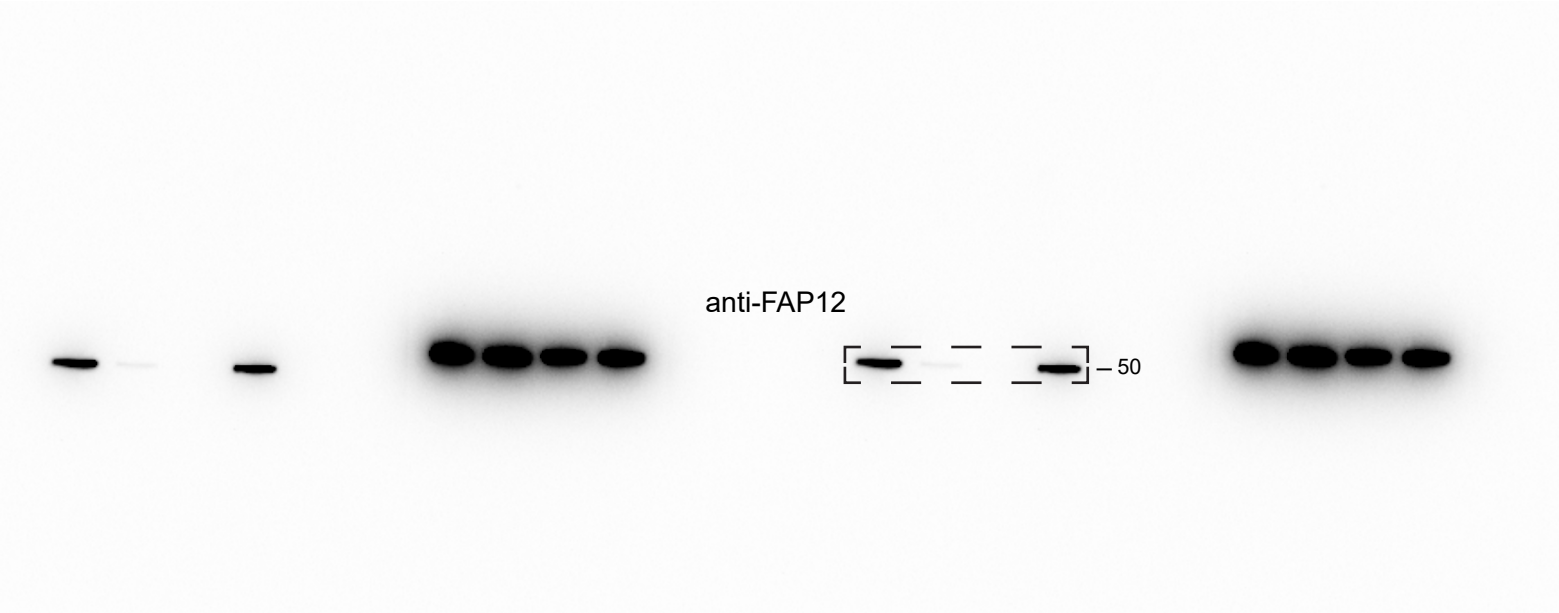

Figure S5D

**Loaded:**

WT, *arl13*, *bbs1*, *bbs4-1*, *bbs7-1*, *bbs8*  
2 blots per image

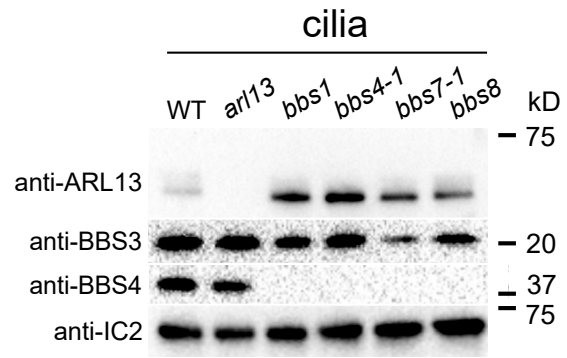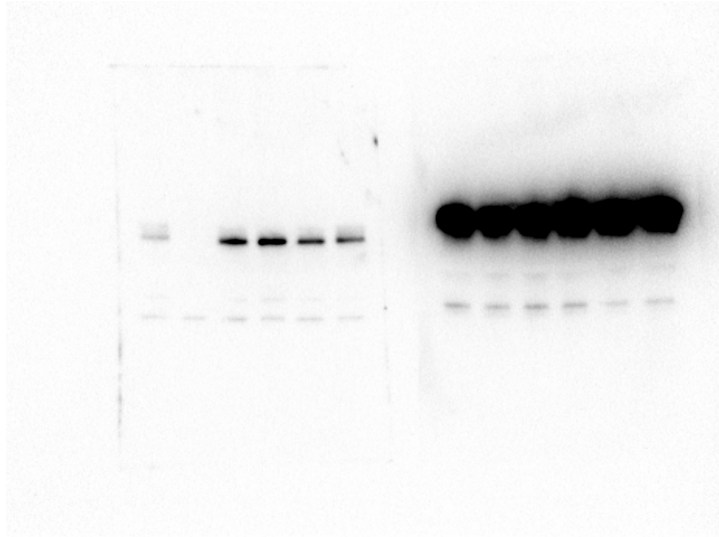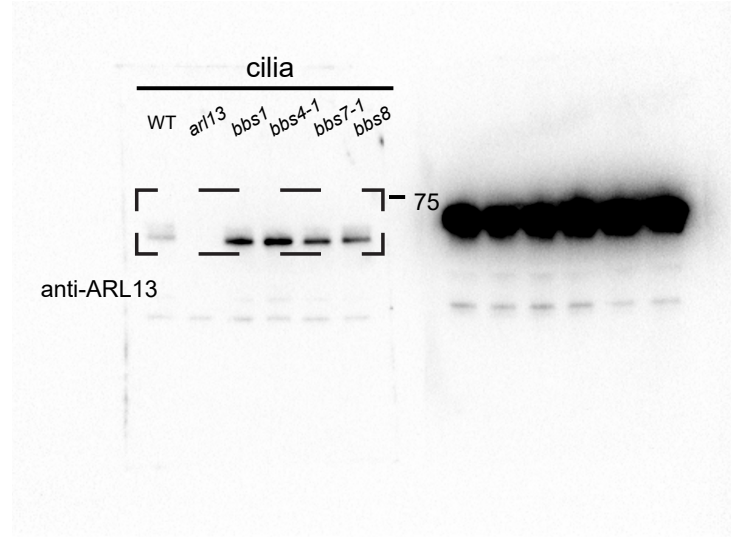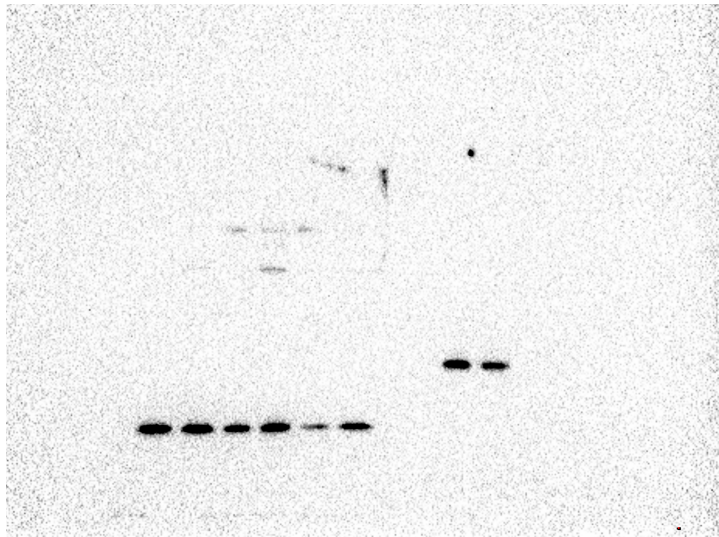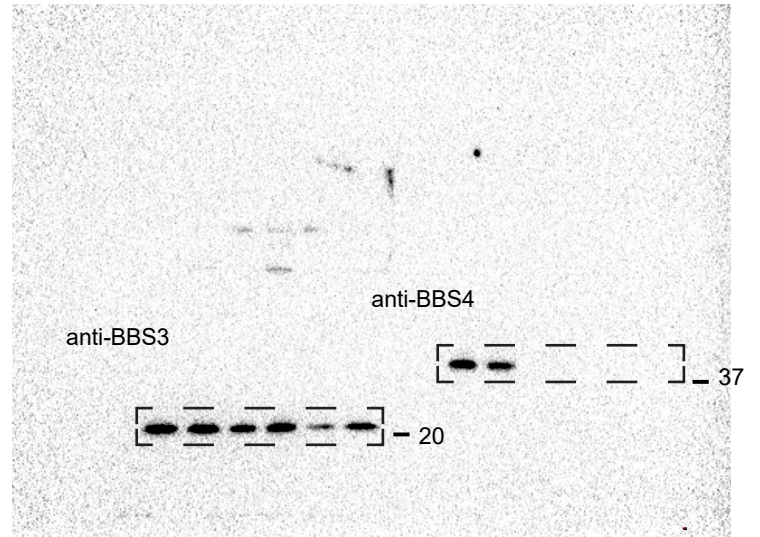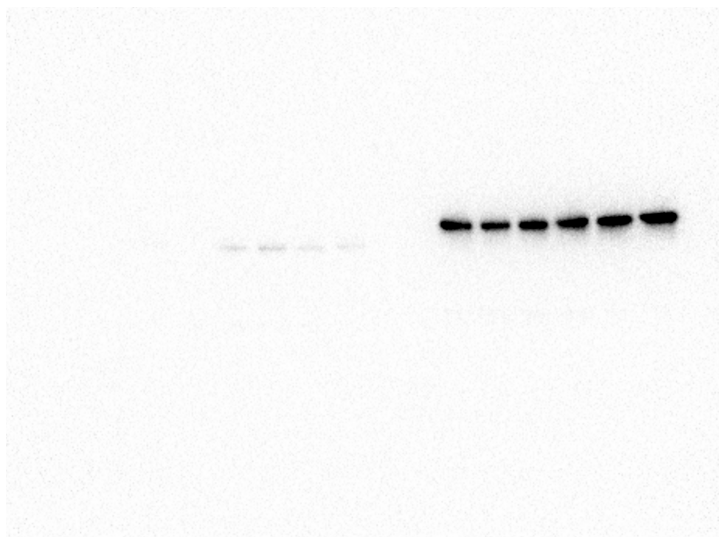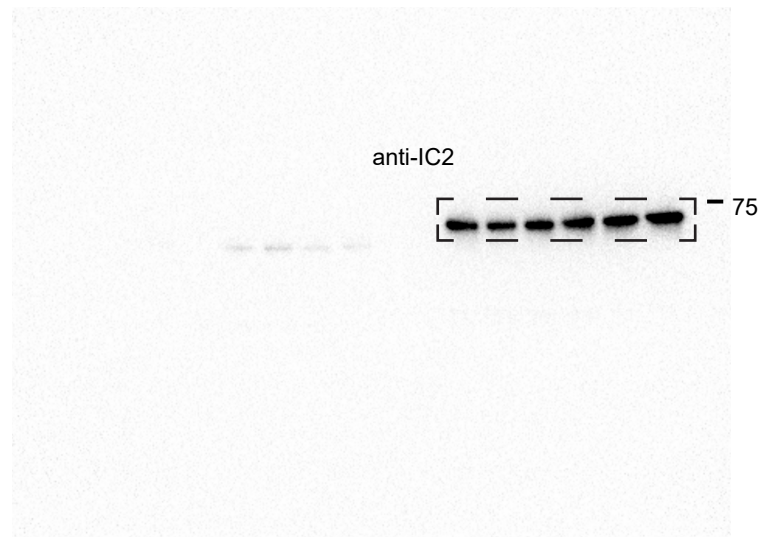

Supplement: JCB_202201050_SourceDataFS5.pdf [file JCB_202201050_SourceDataFS5.pdf]
